# Supplementary material
Source: HighWire-hosted journal article supplement (https://bjsm.bmj.com/content/54/24/1488)

Scaled density distributions of the mean weekly minutes and relative contributions of domain-specific MVPA to total MVPA

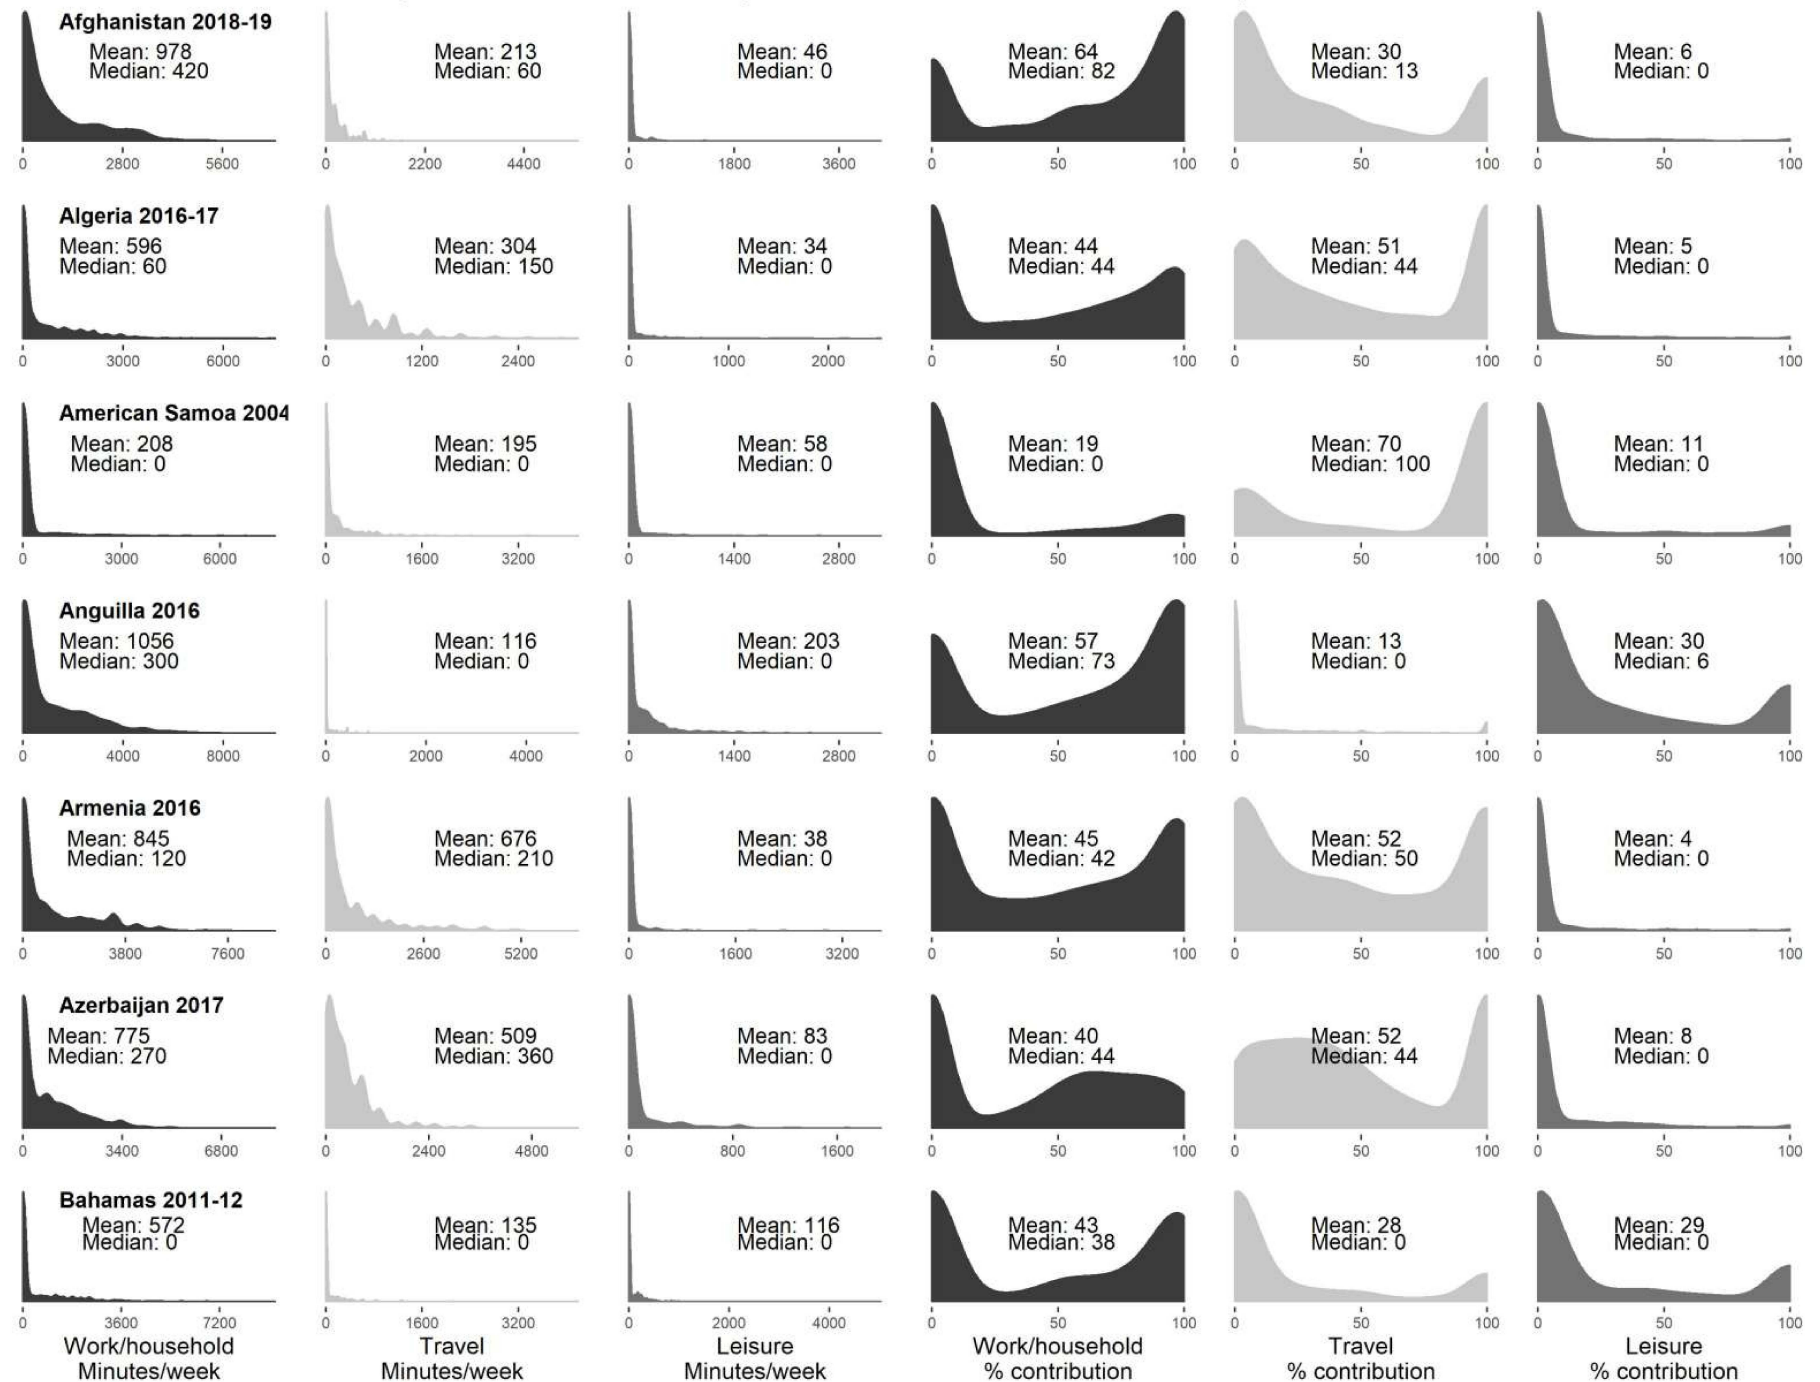

The first three panels display the scaled density distributions for the reported weekly minutes in the work/household, travel, and leisure domains respectively. The second three panels display the scaled density distributions for the relative contributions of the domains to total MVPA (requires at least 1 minute/week of MVPA across any domain to be reported to have non-zero denominator). Cameroon, Central African Republic, Chad, Côte d'Ivoire, Democratic Republic of the Congo, Ethiopia, Gabon, Guinea, Madagascar, Maldives, Mali, Mauritania, Micronesia Fed. Sts., and Pakistan are subnational surveys and no adjustment has been made to the data presented in this figure.

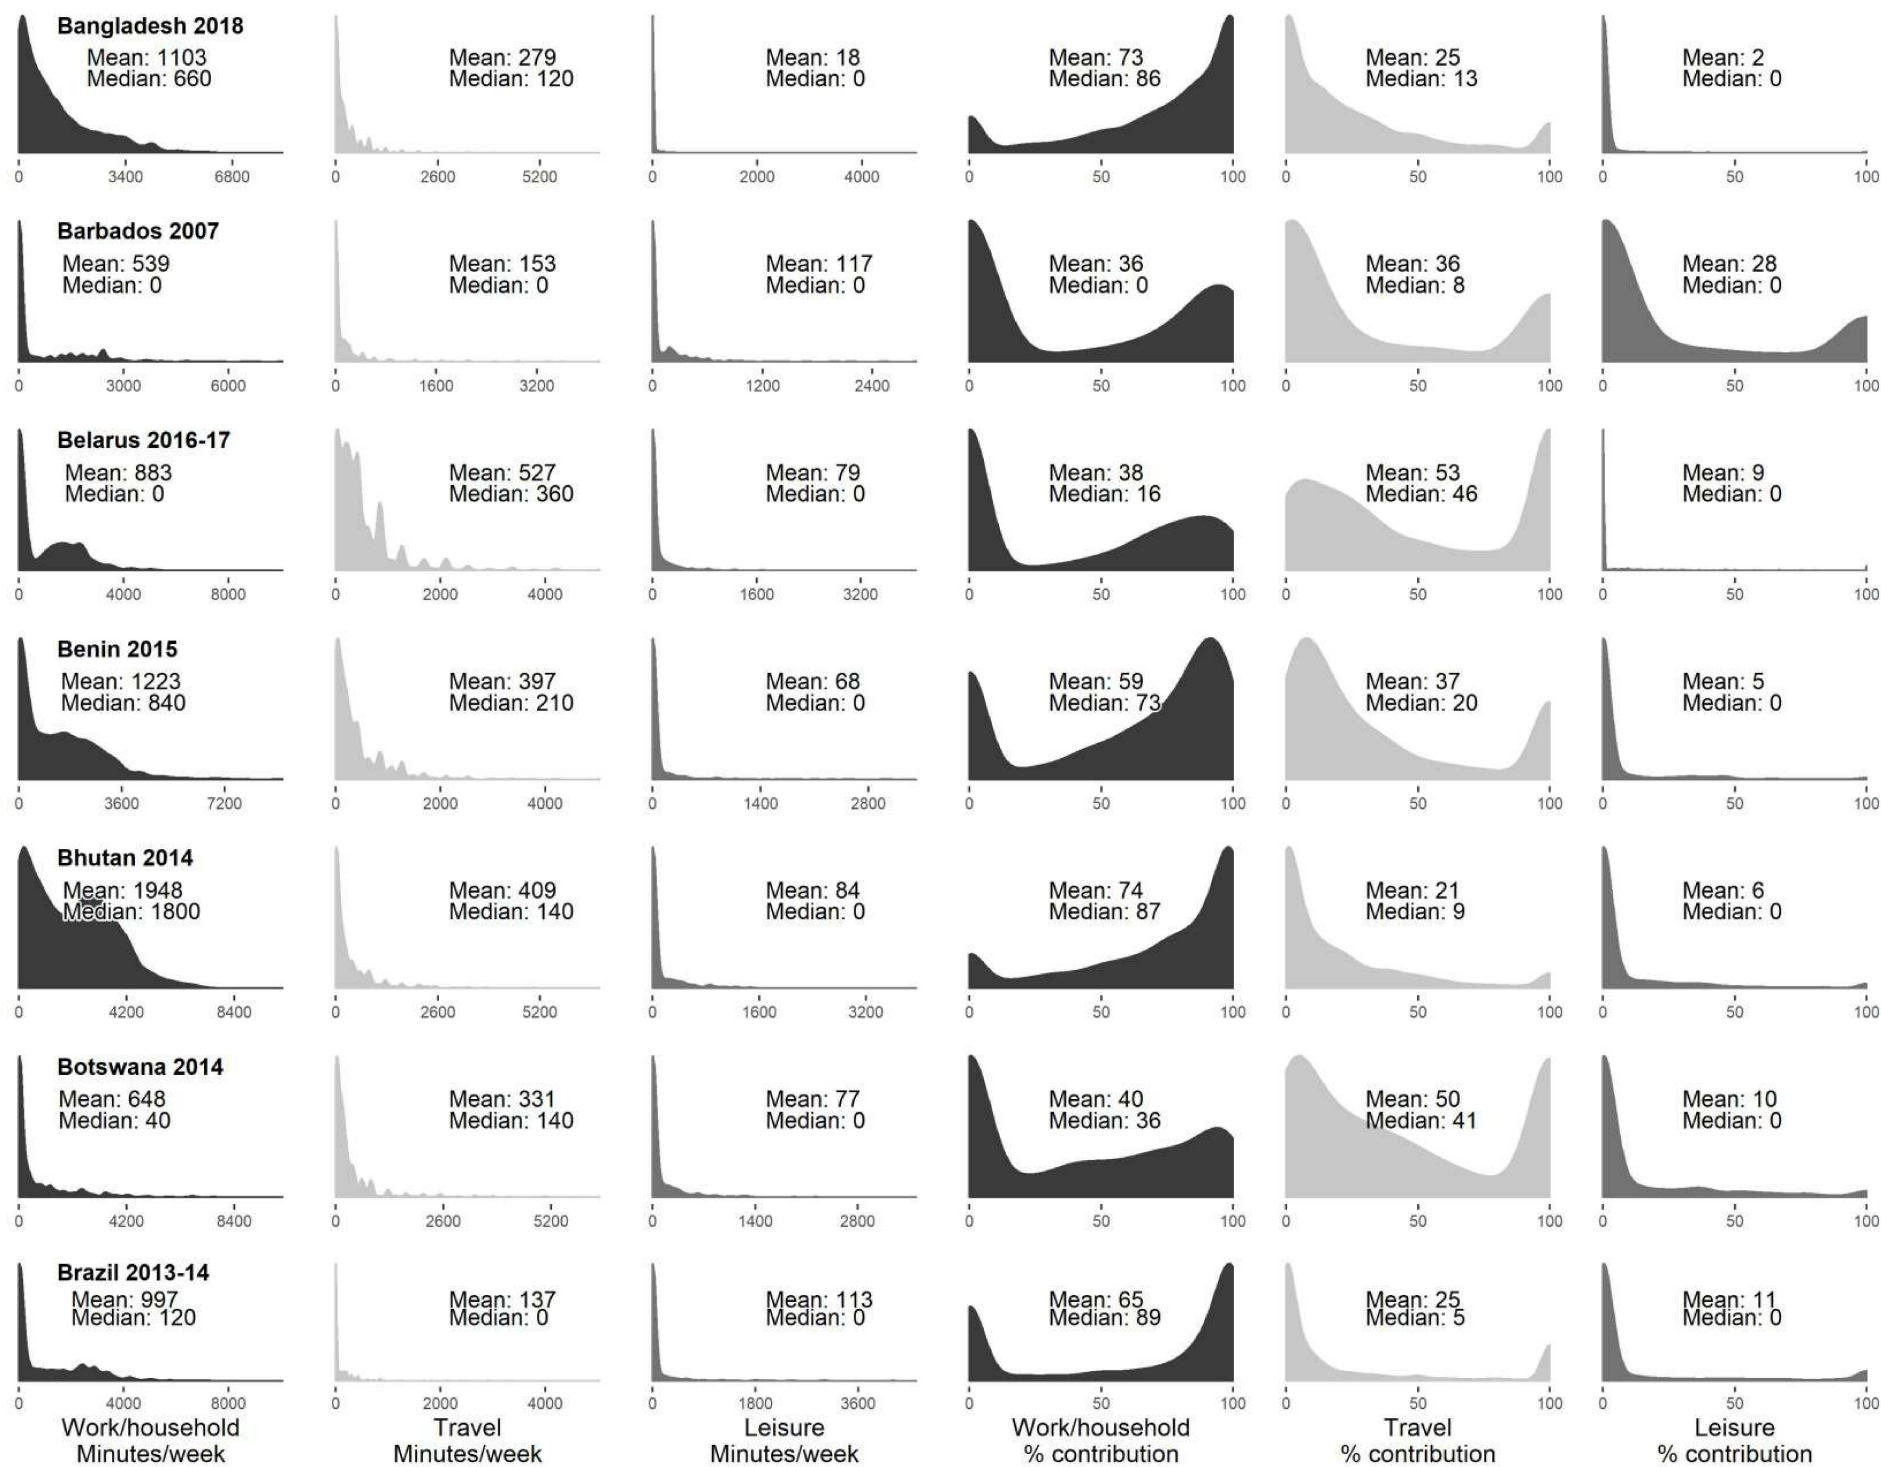

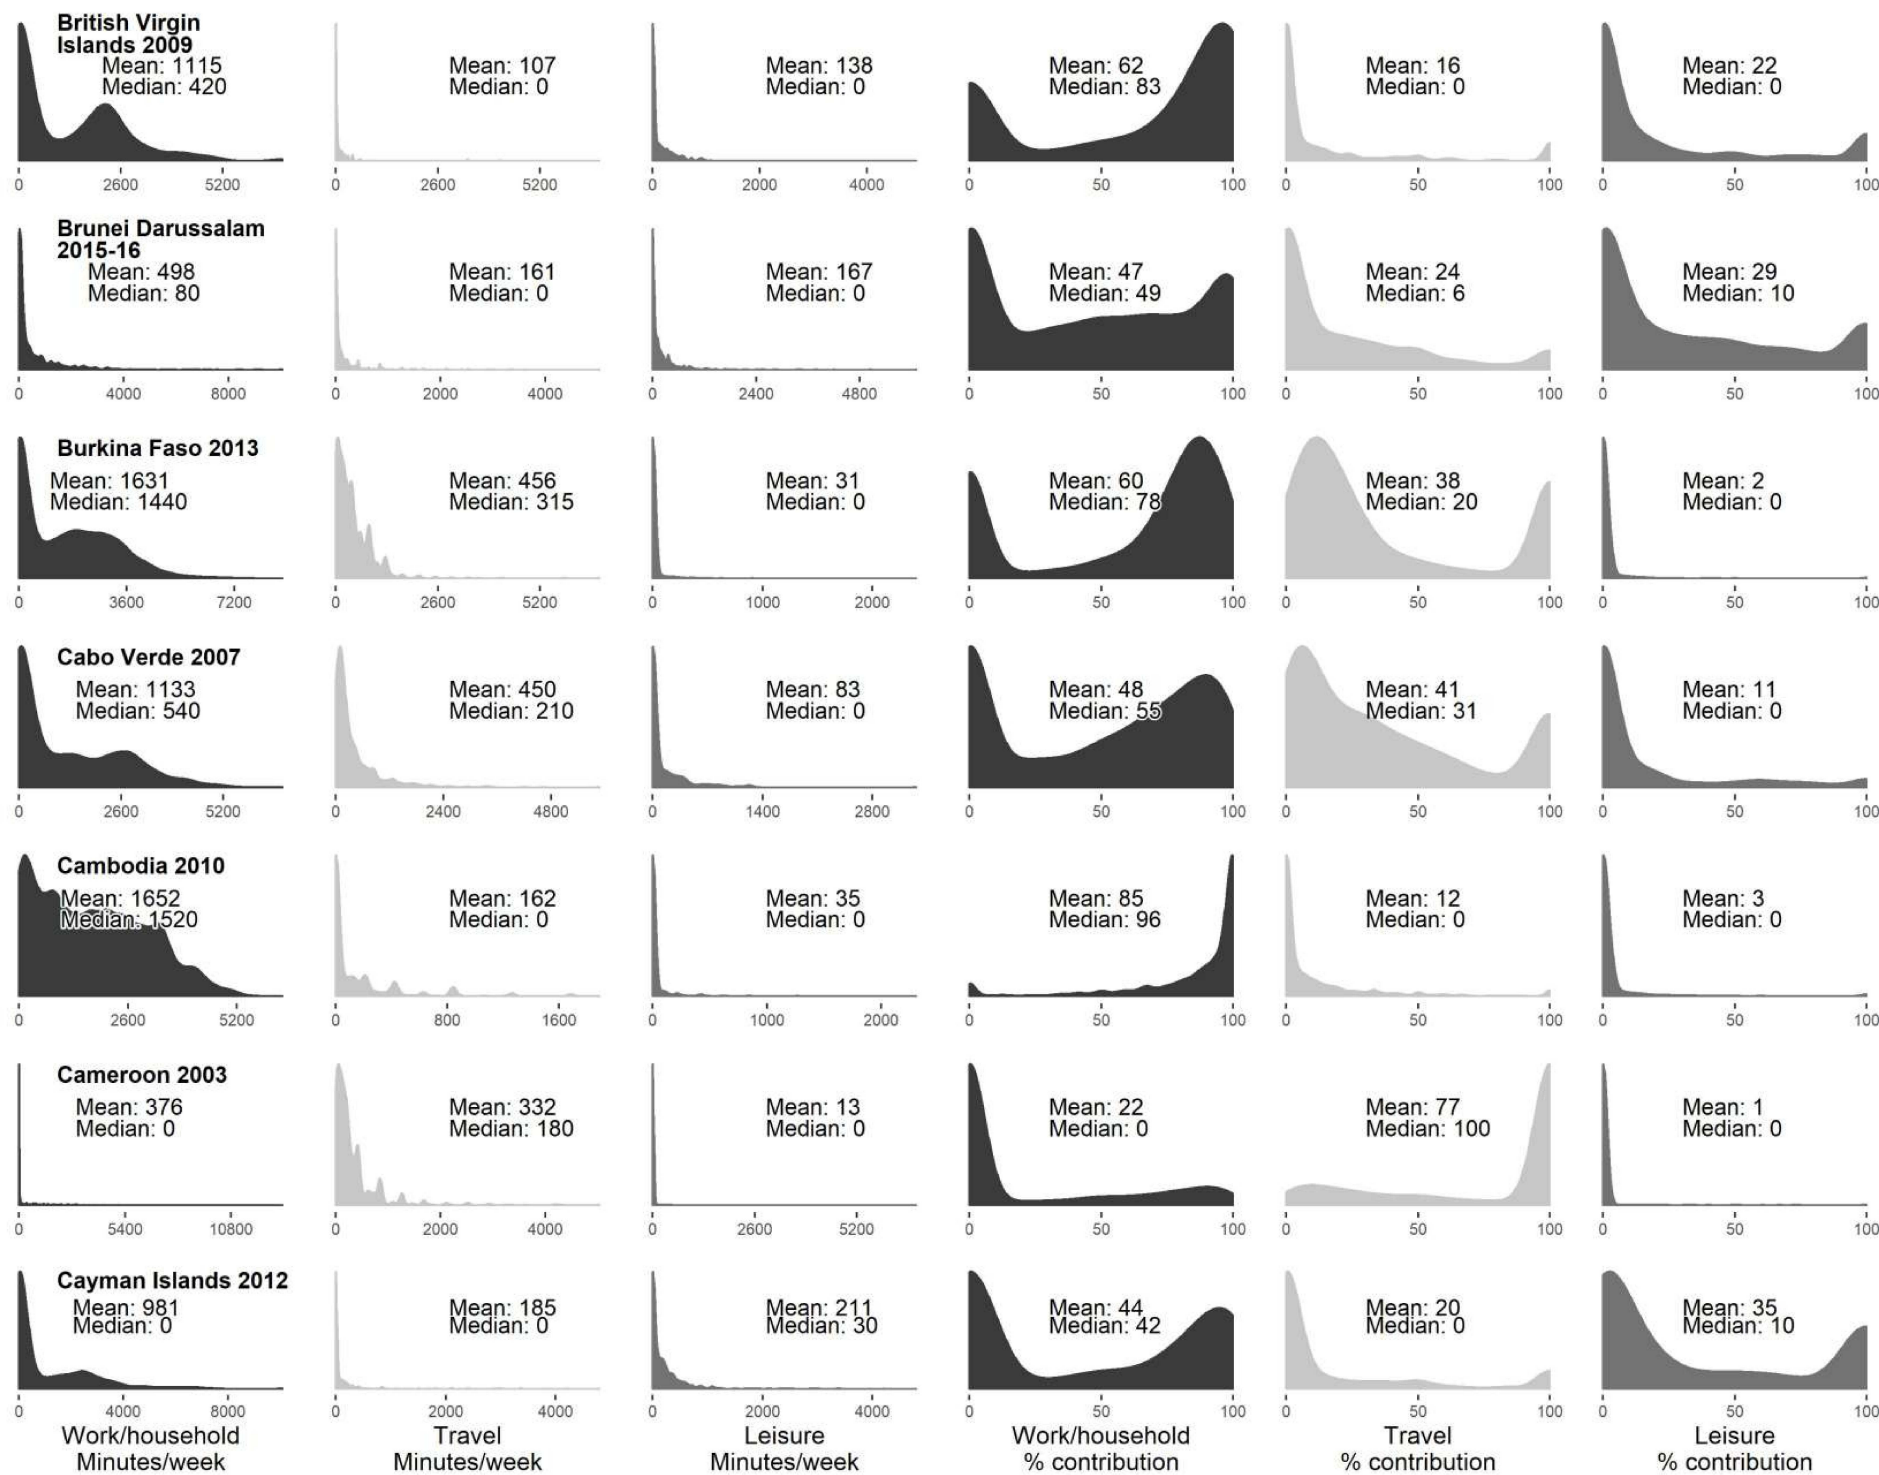



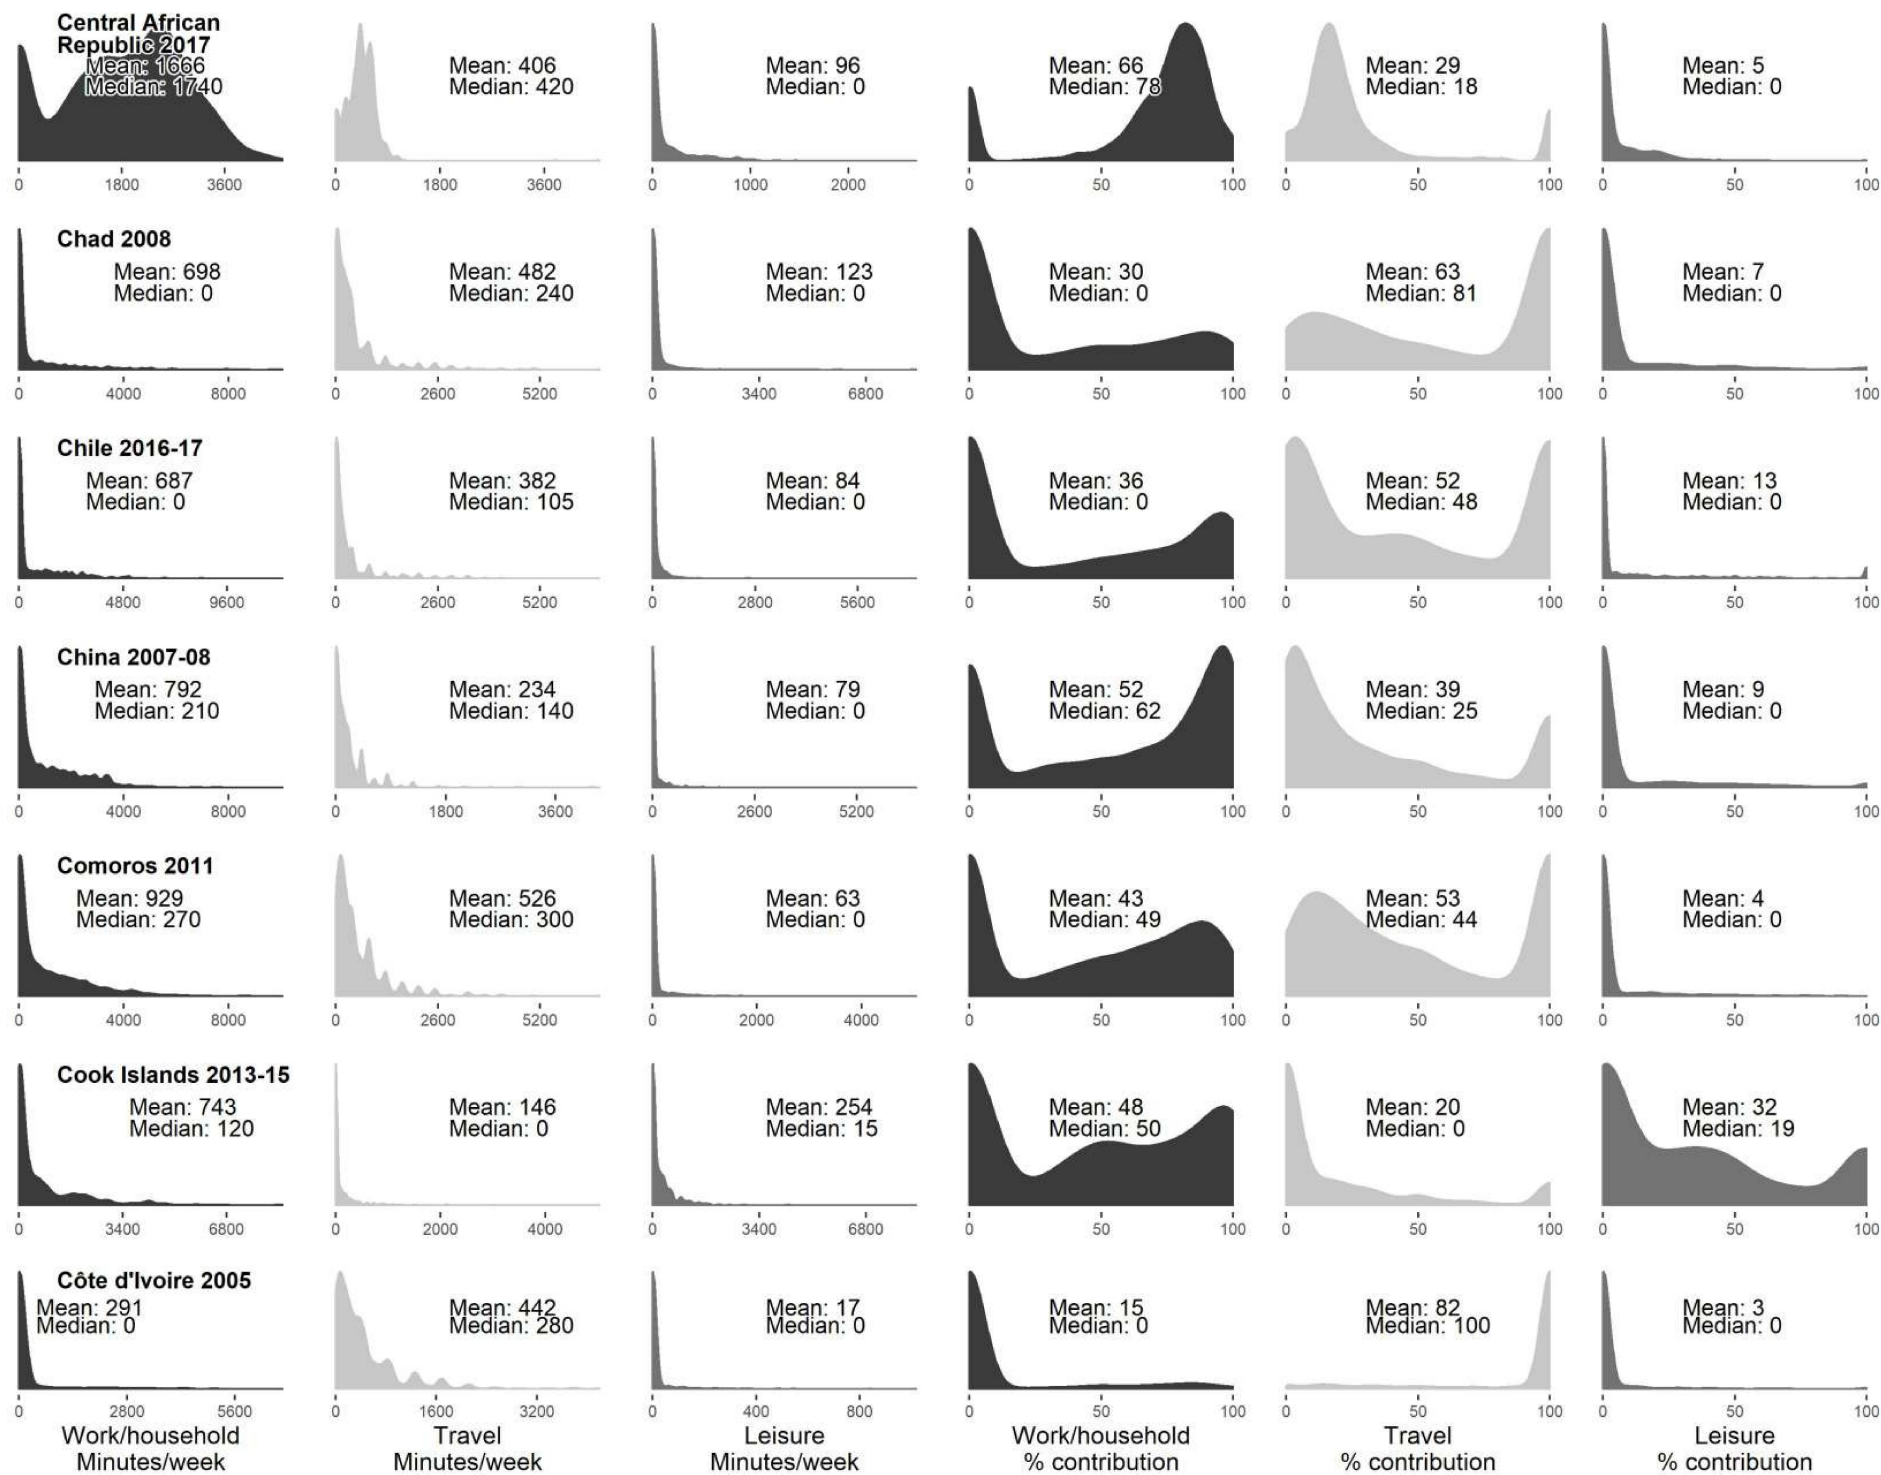



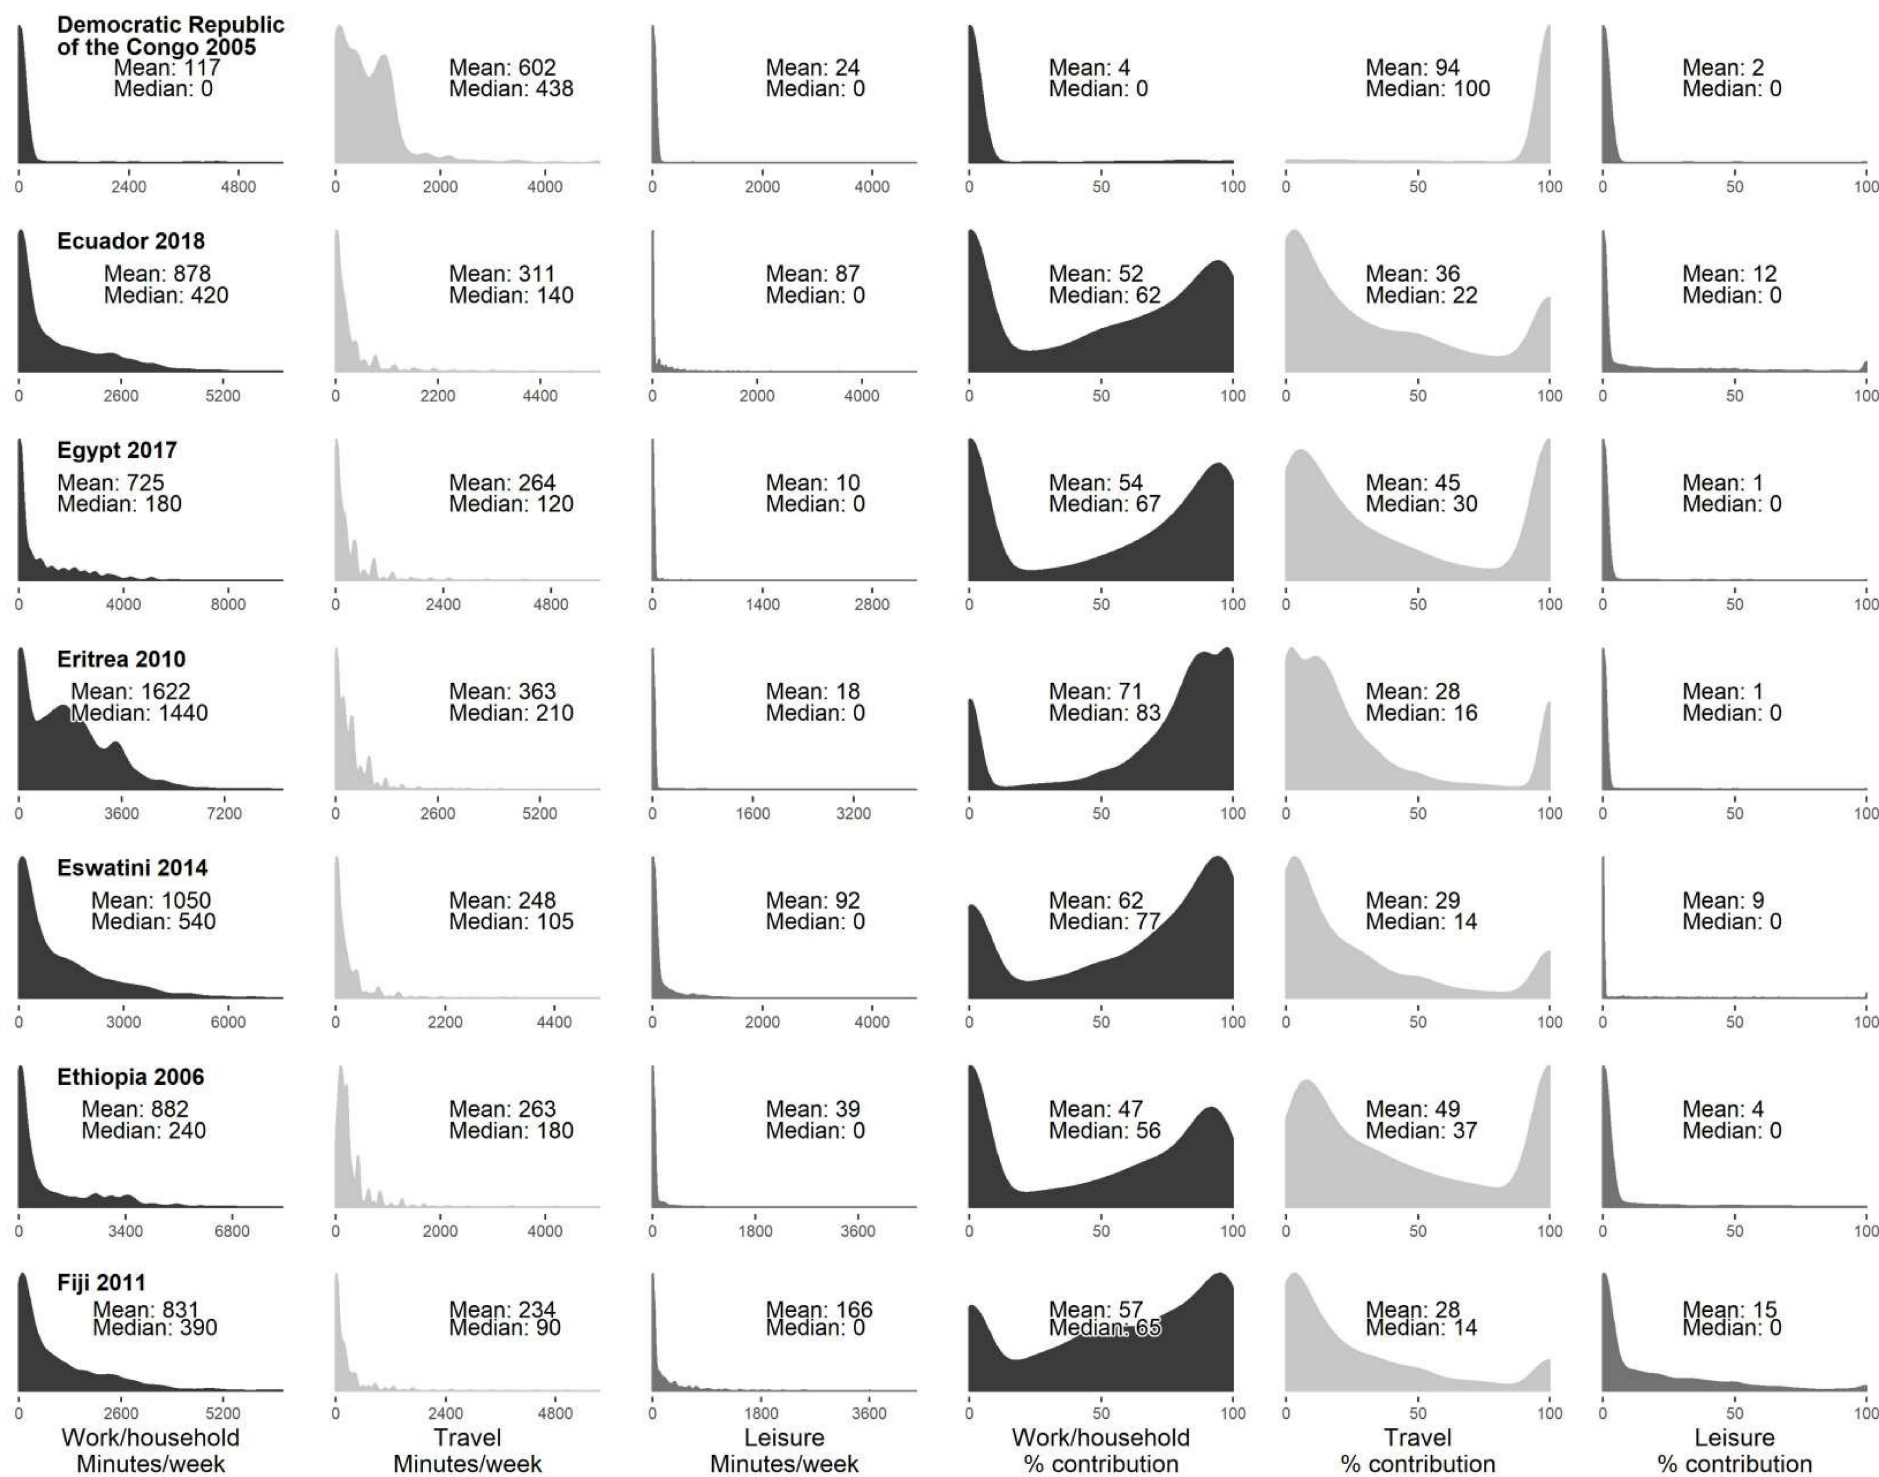

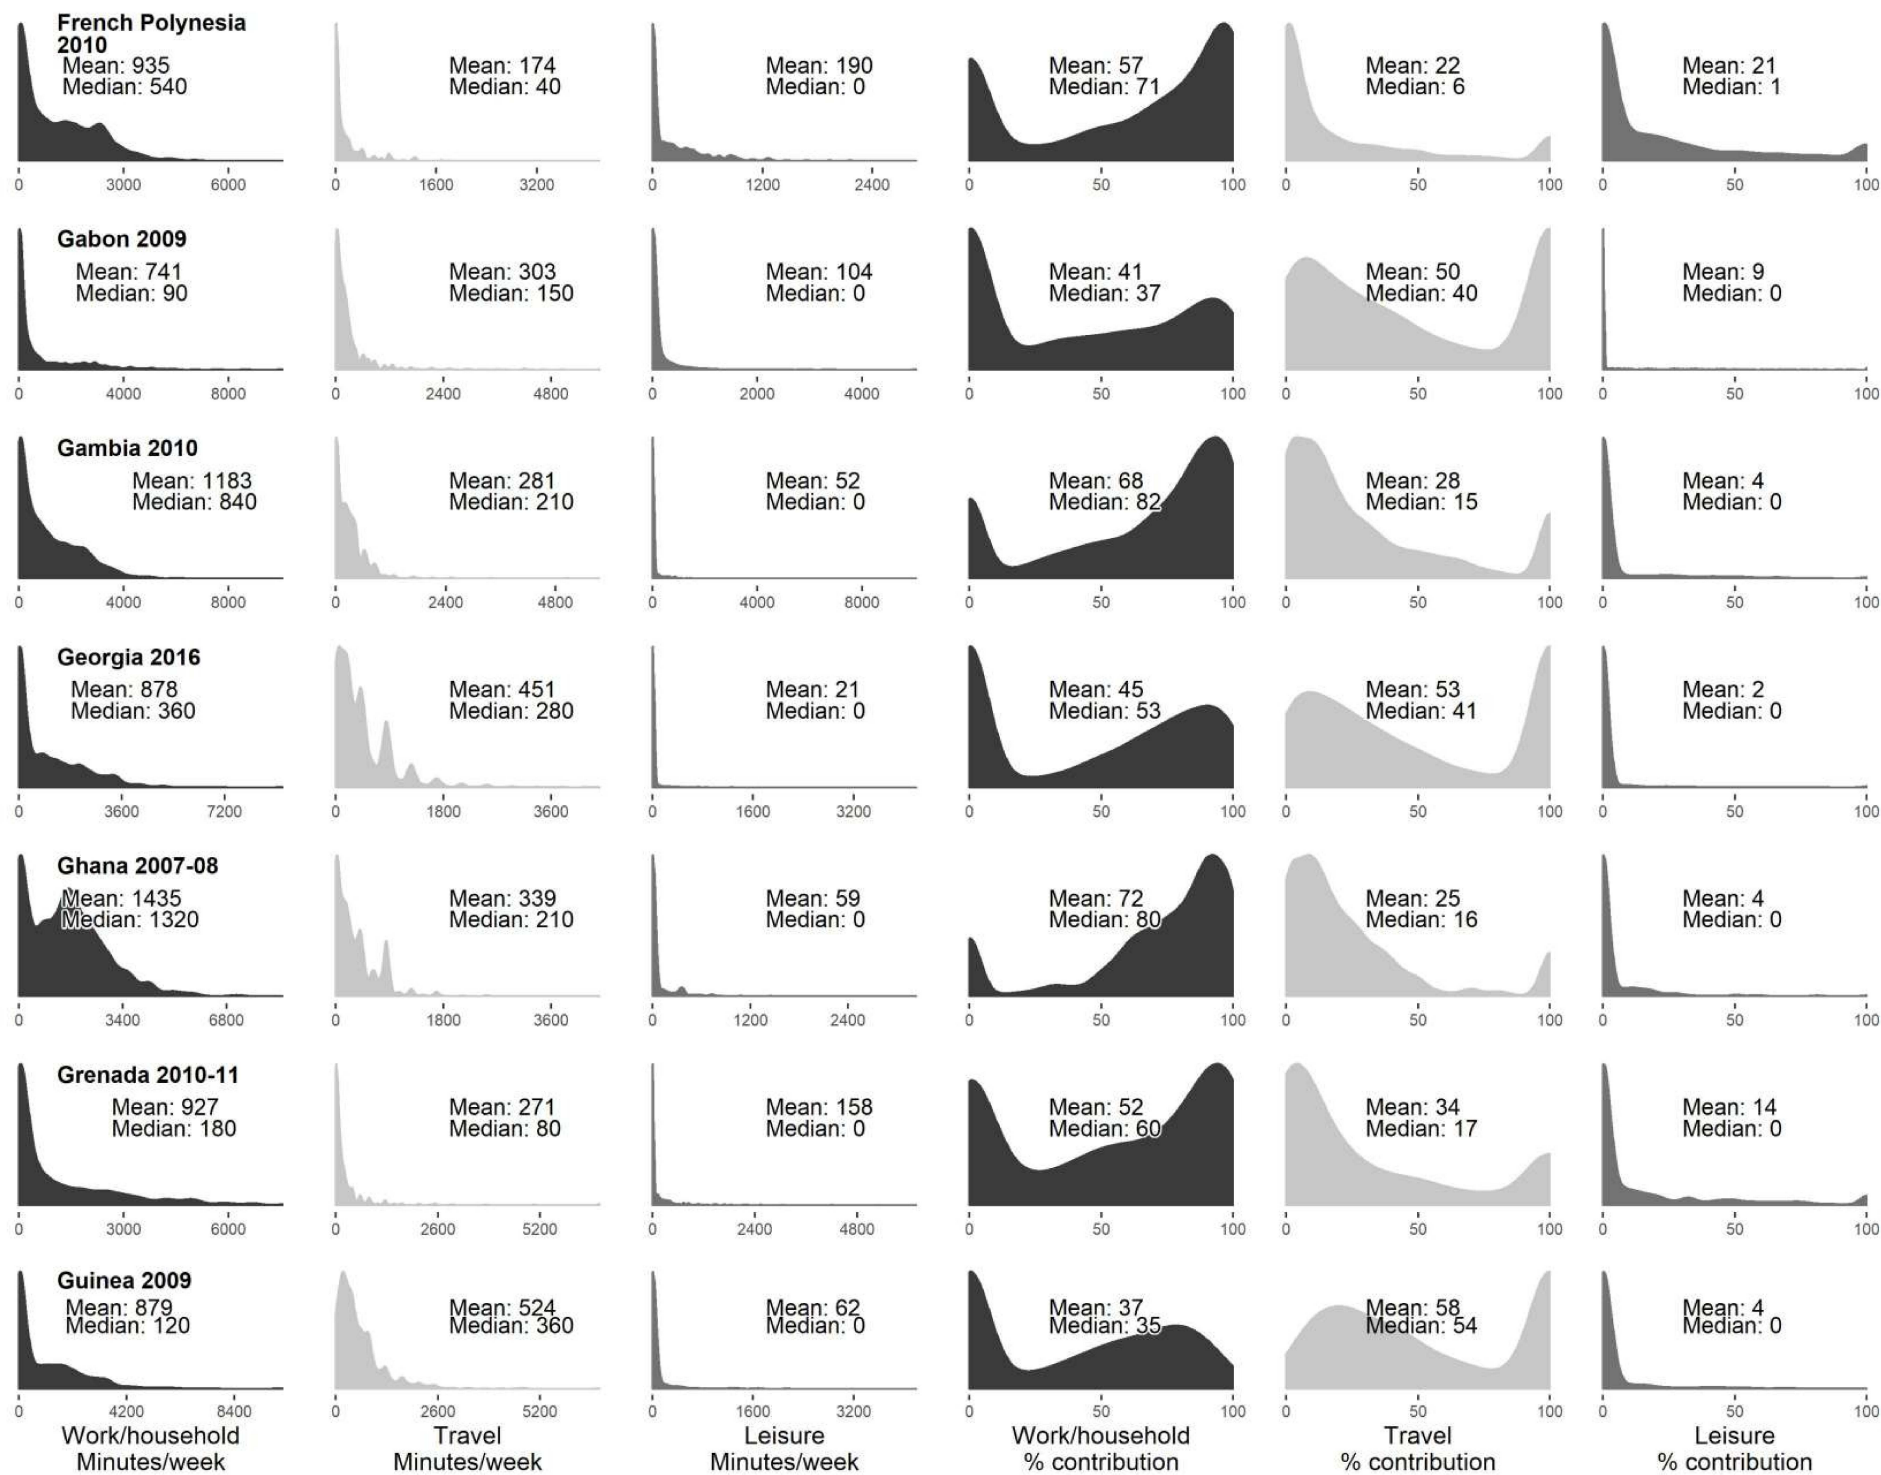

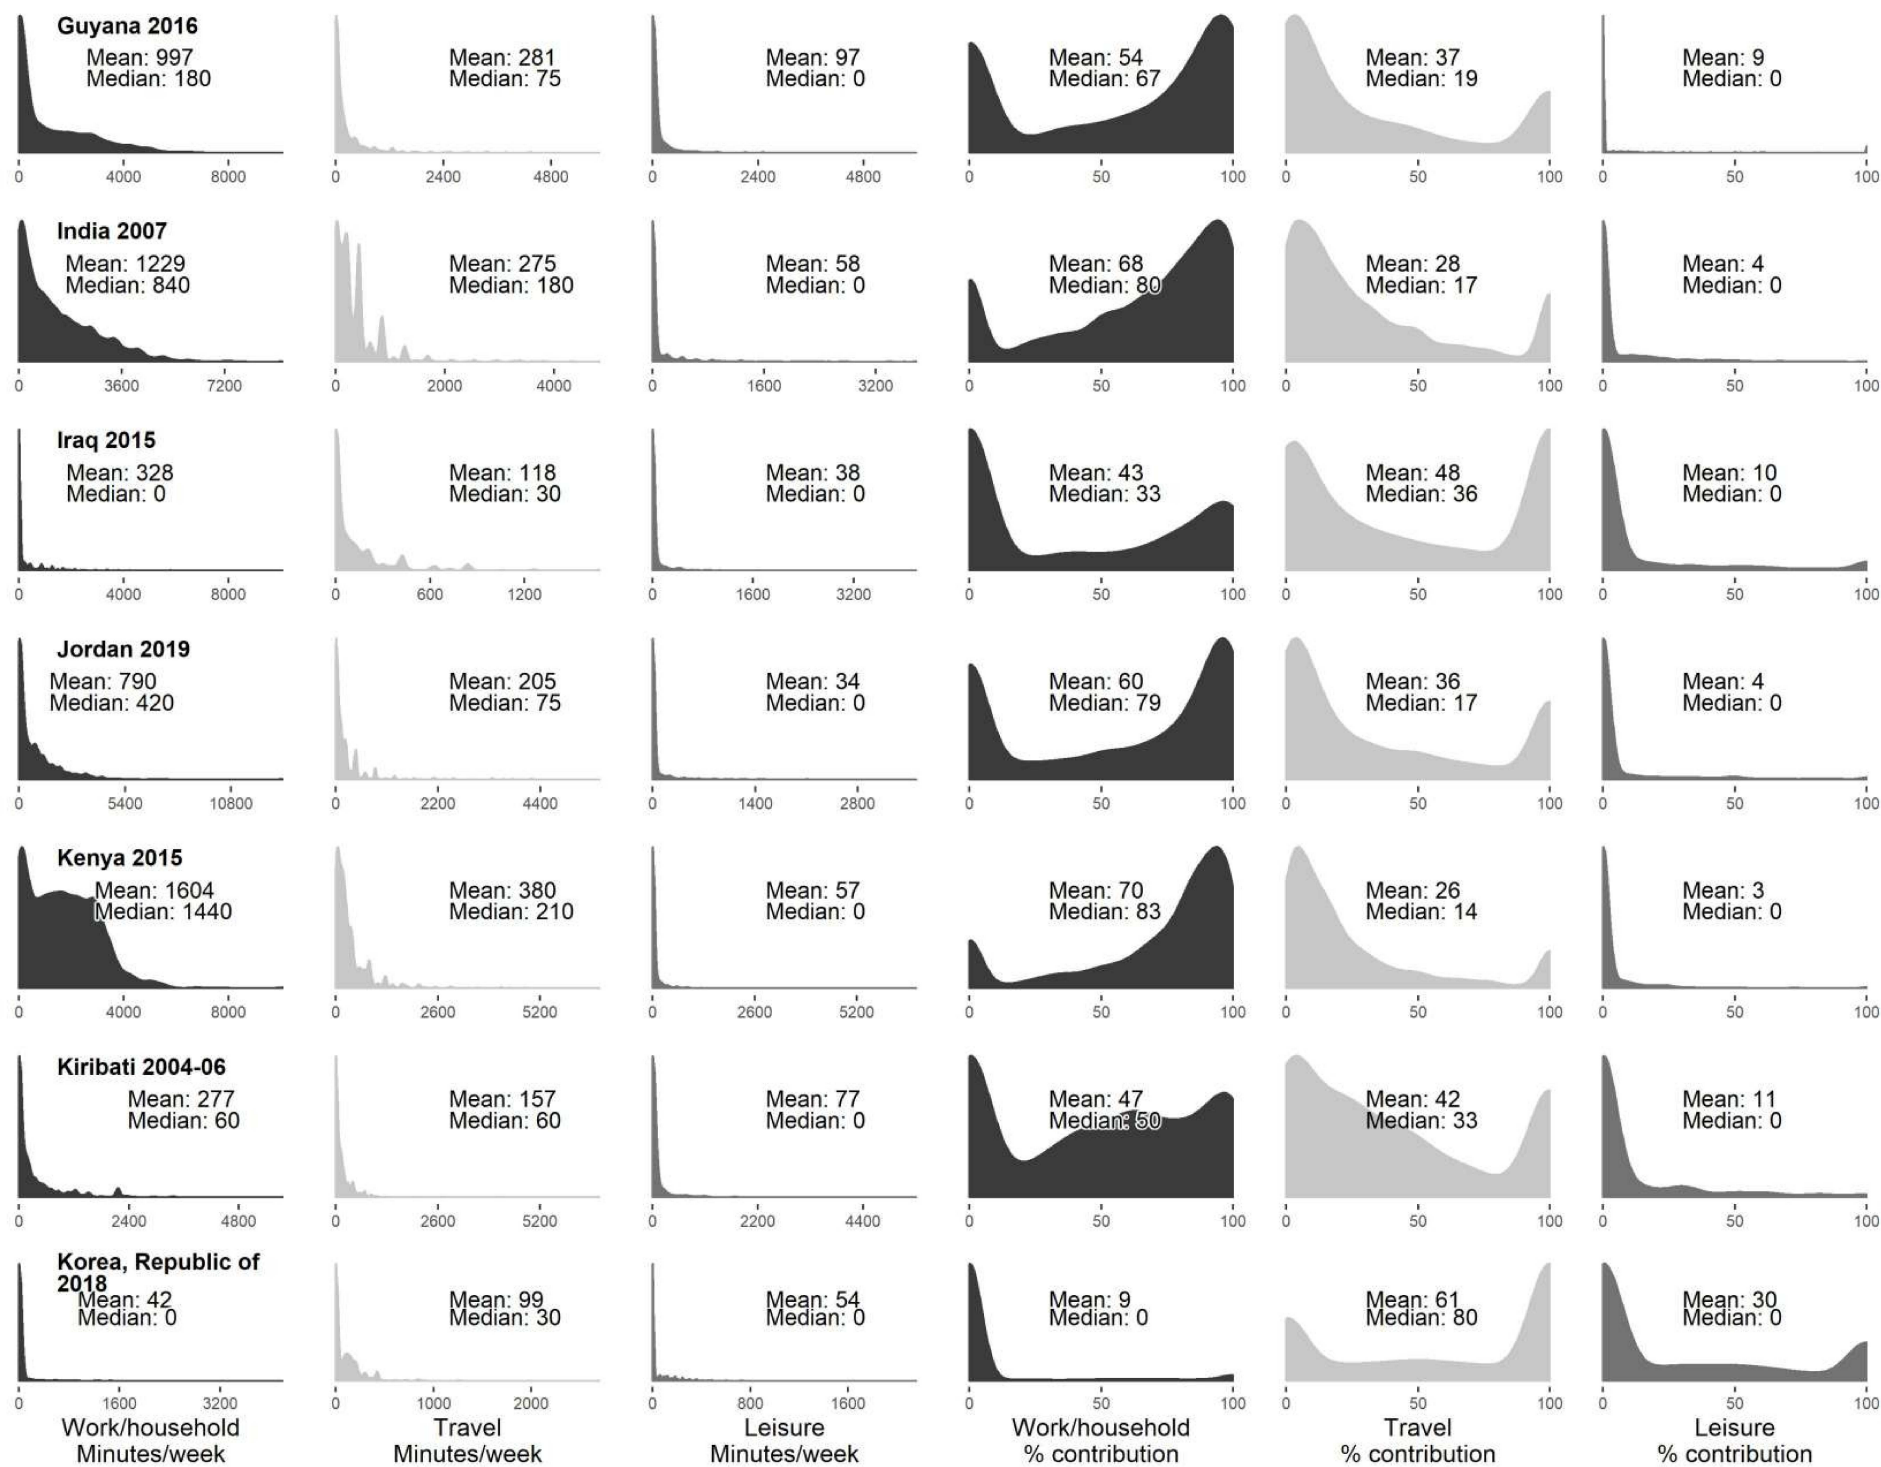



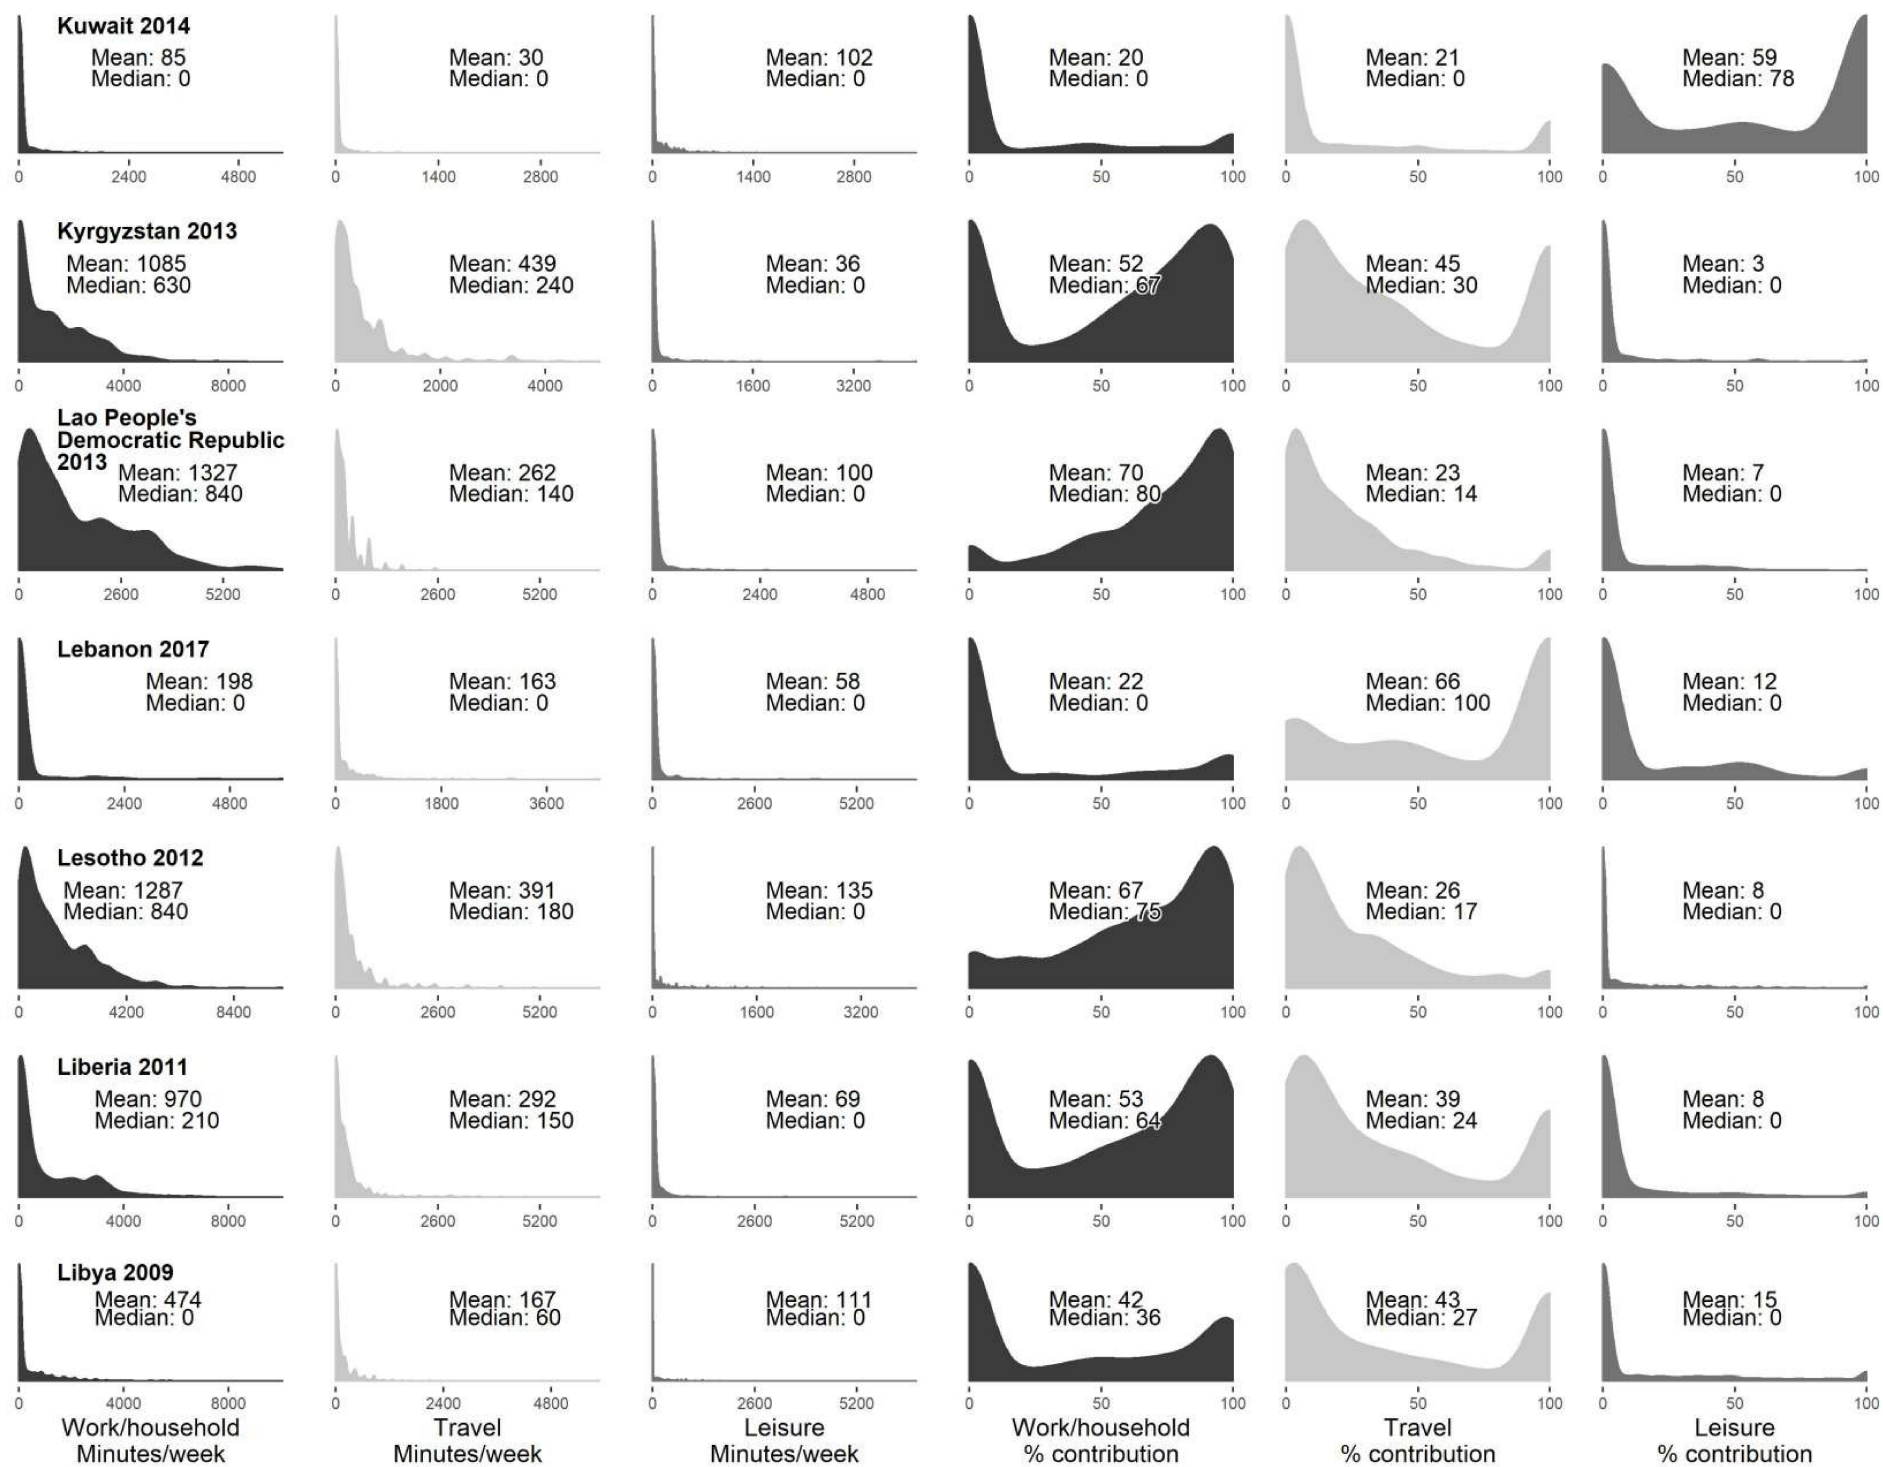

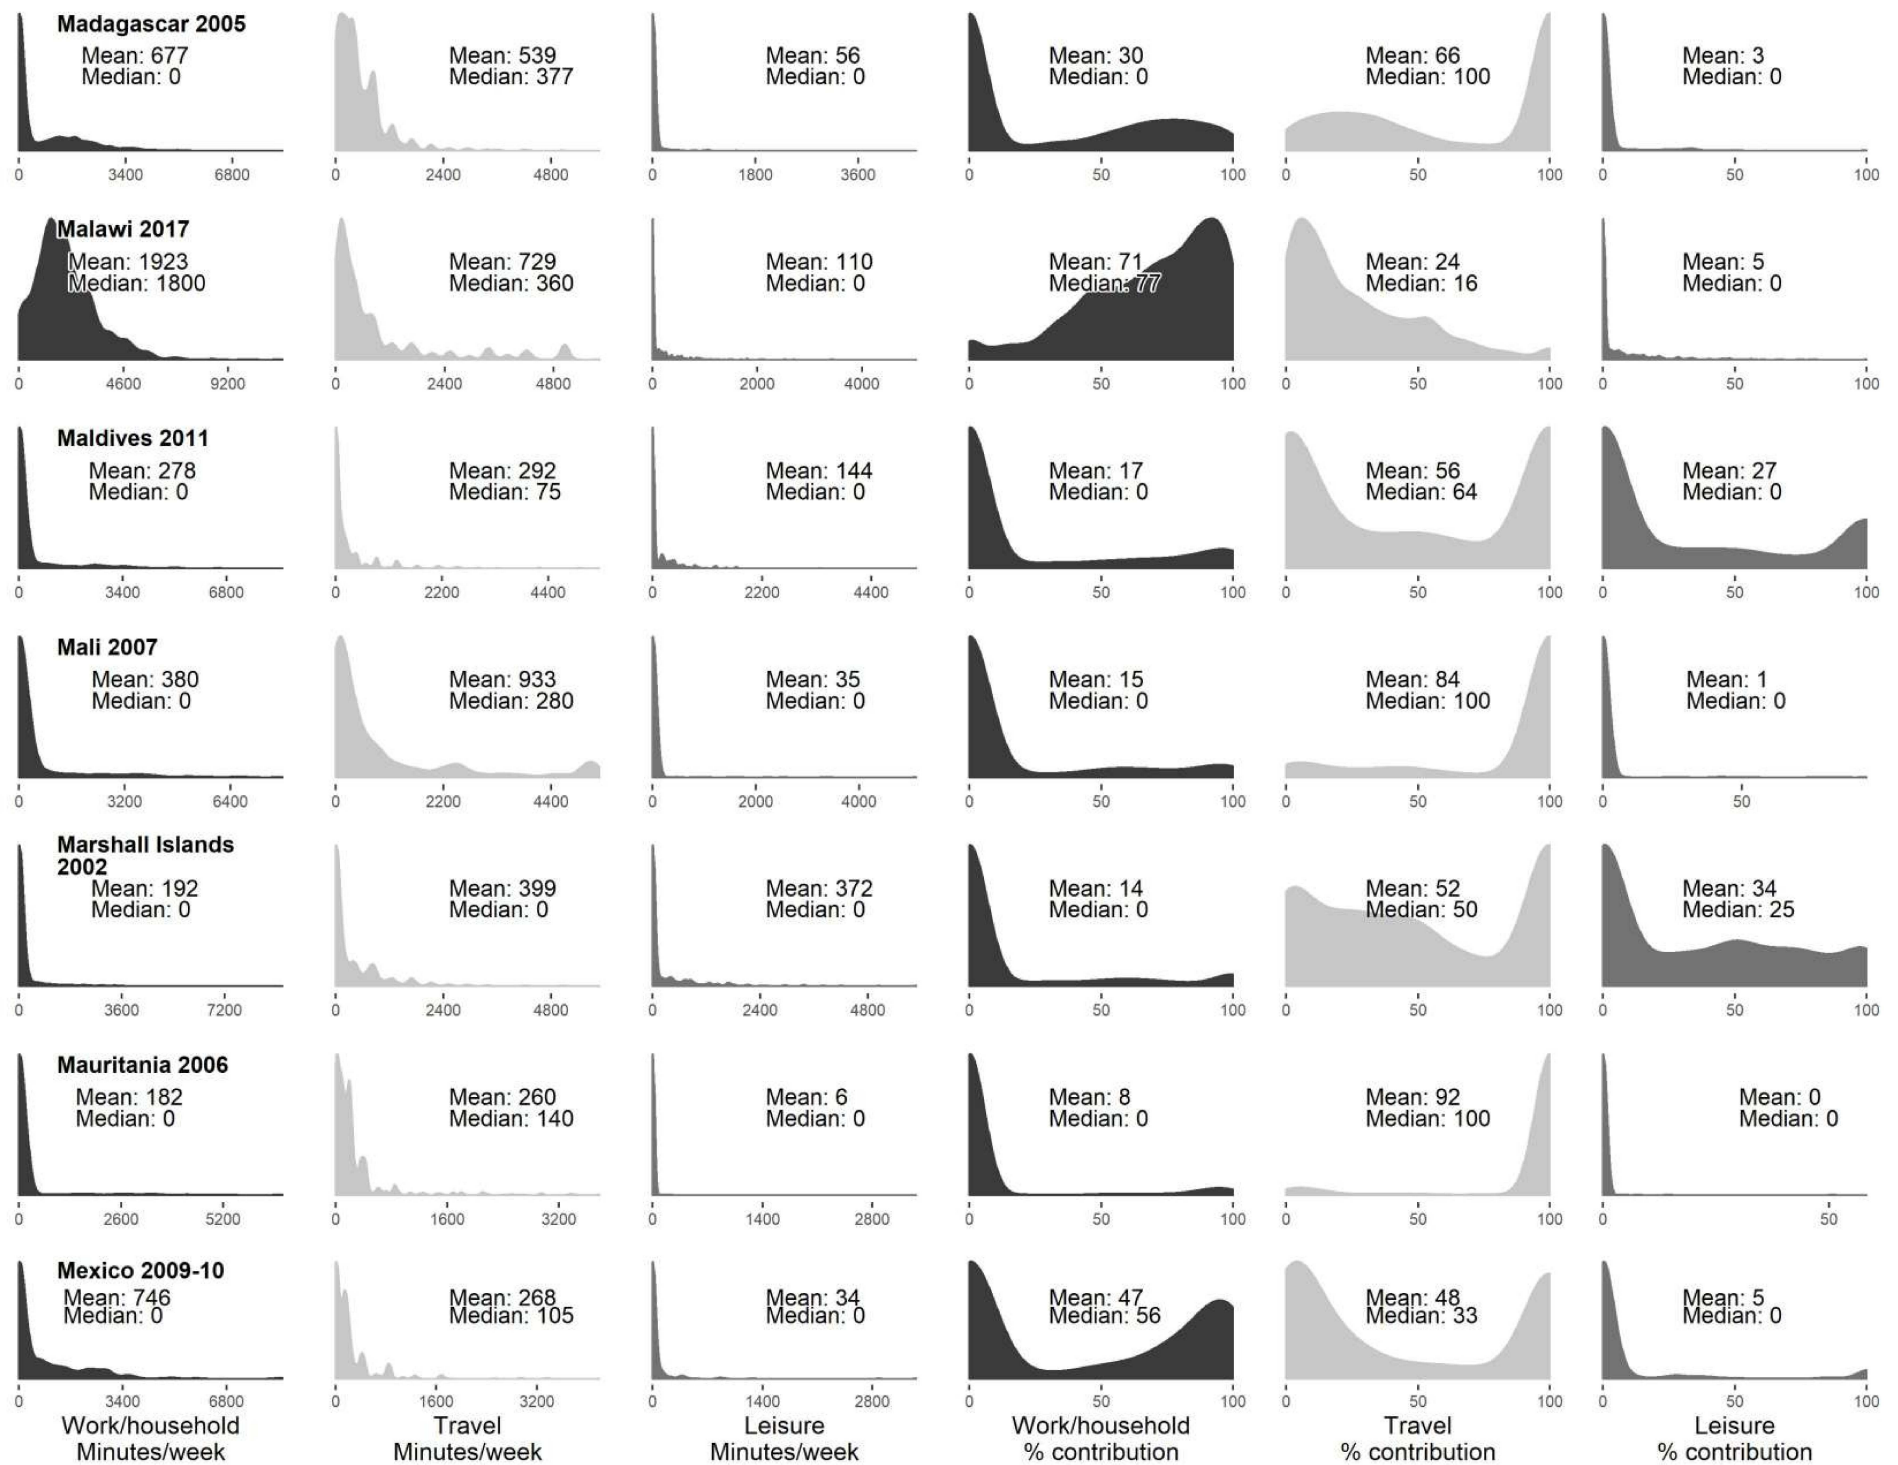

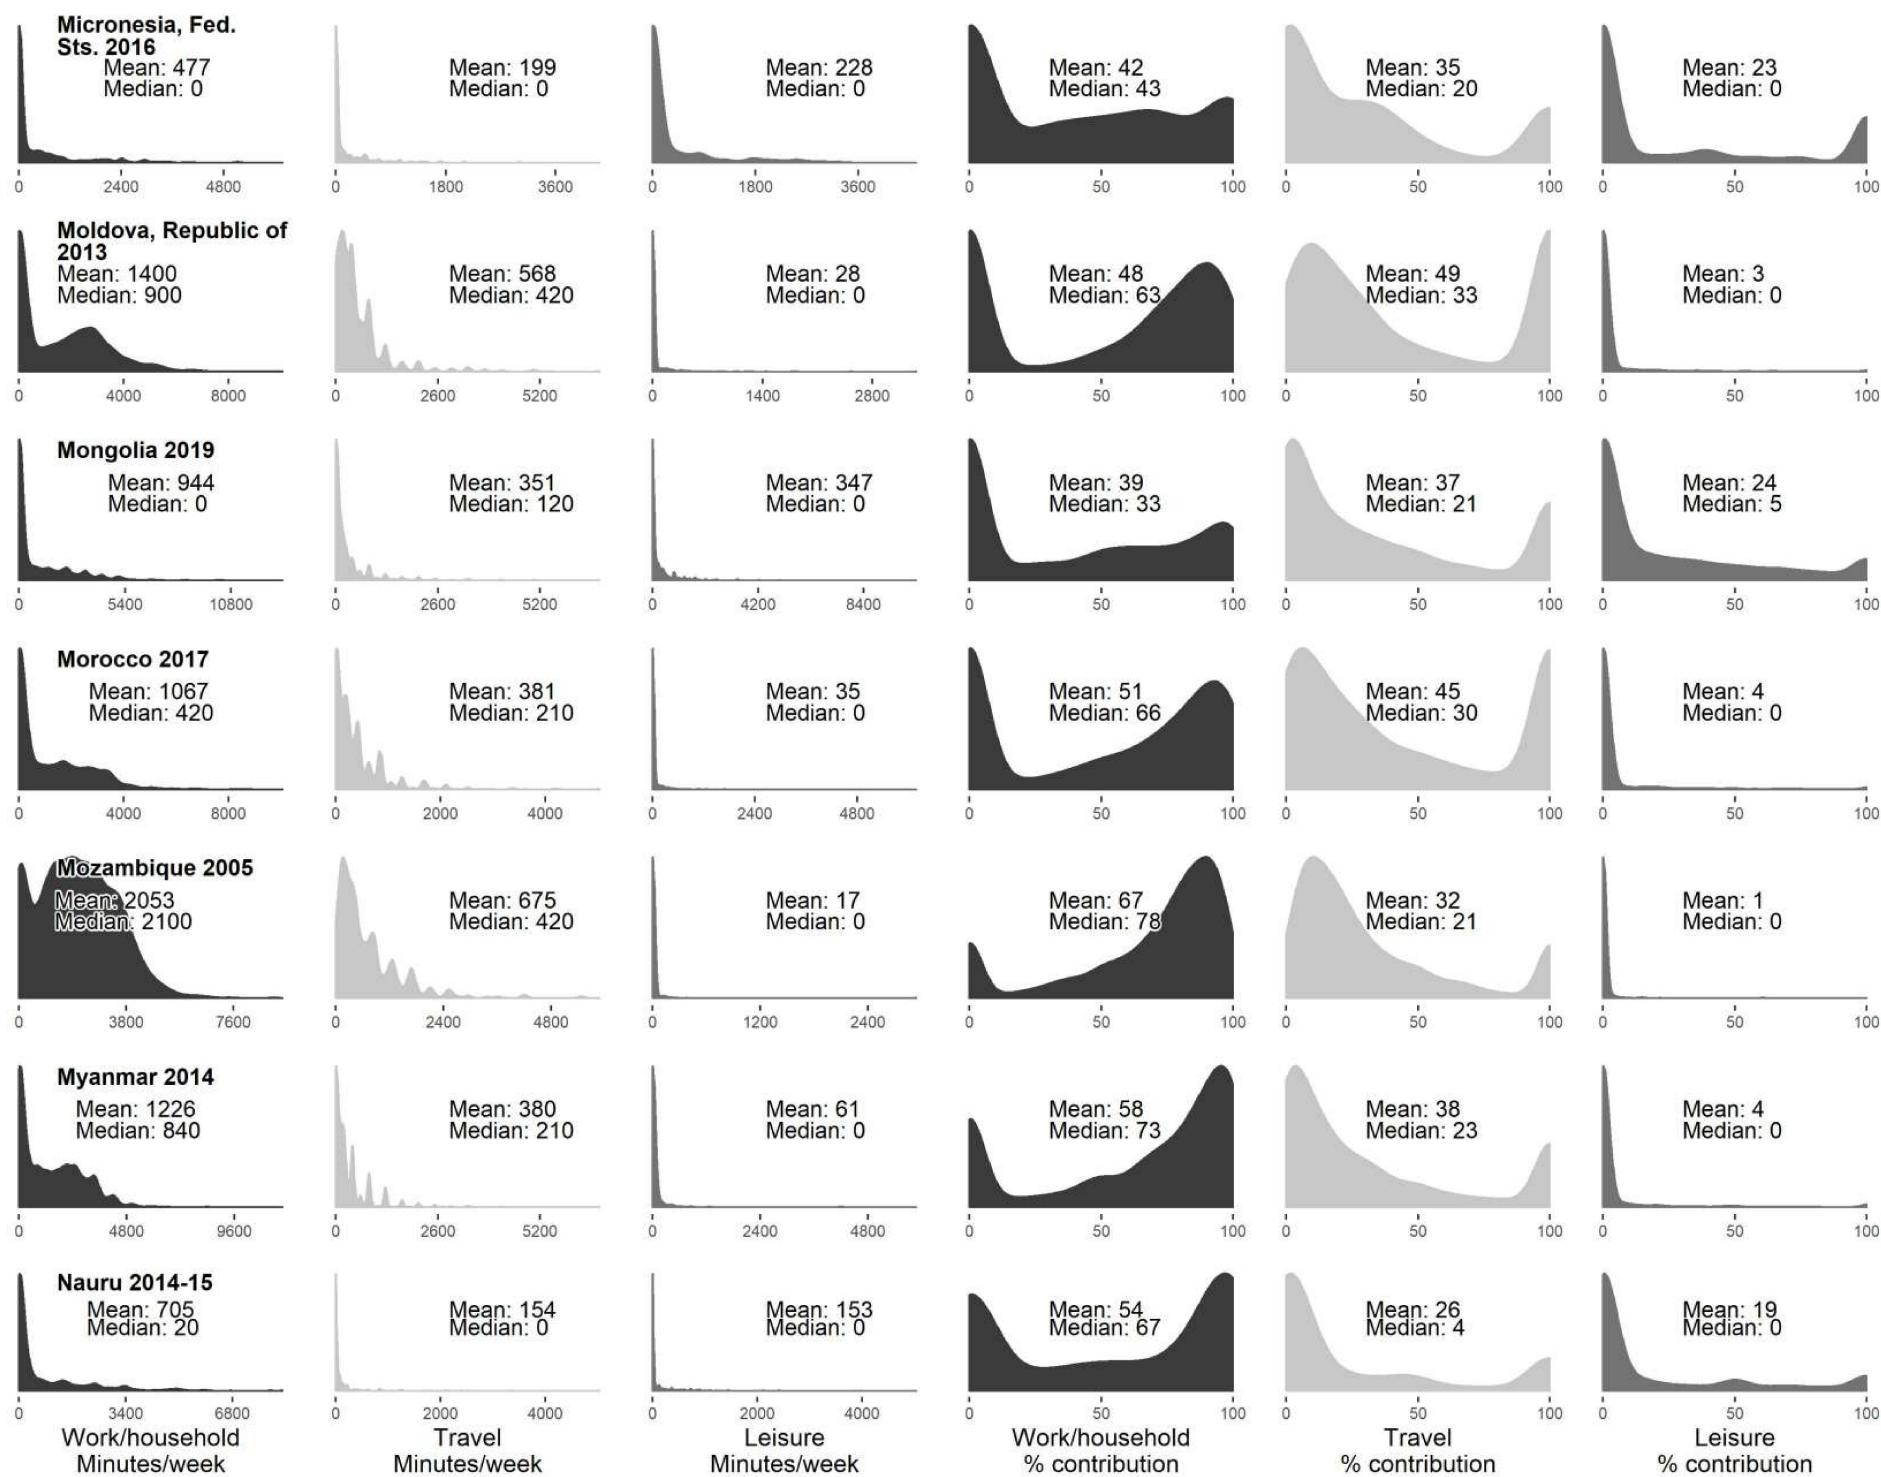



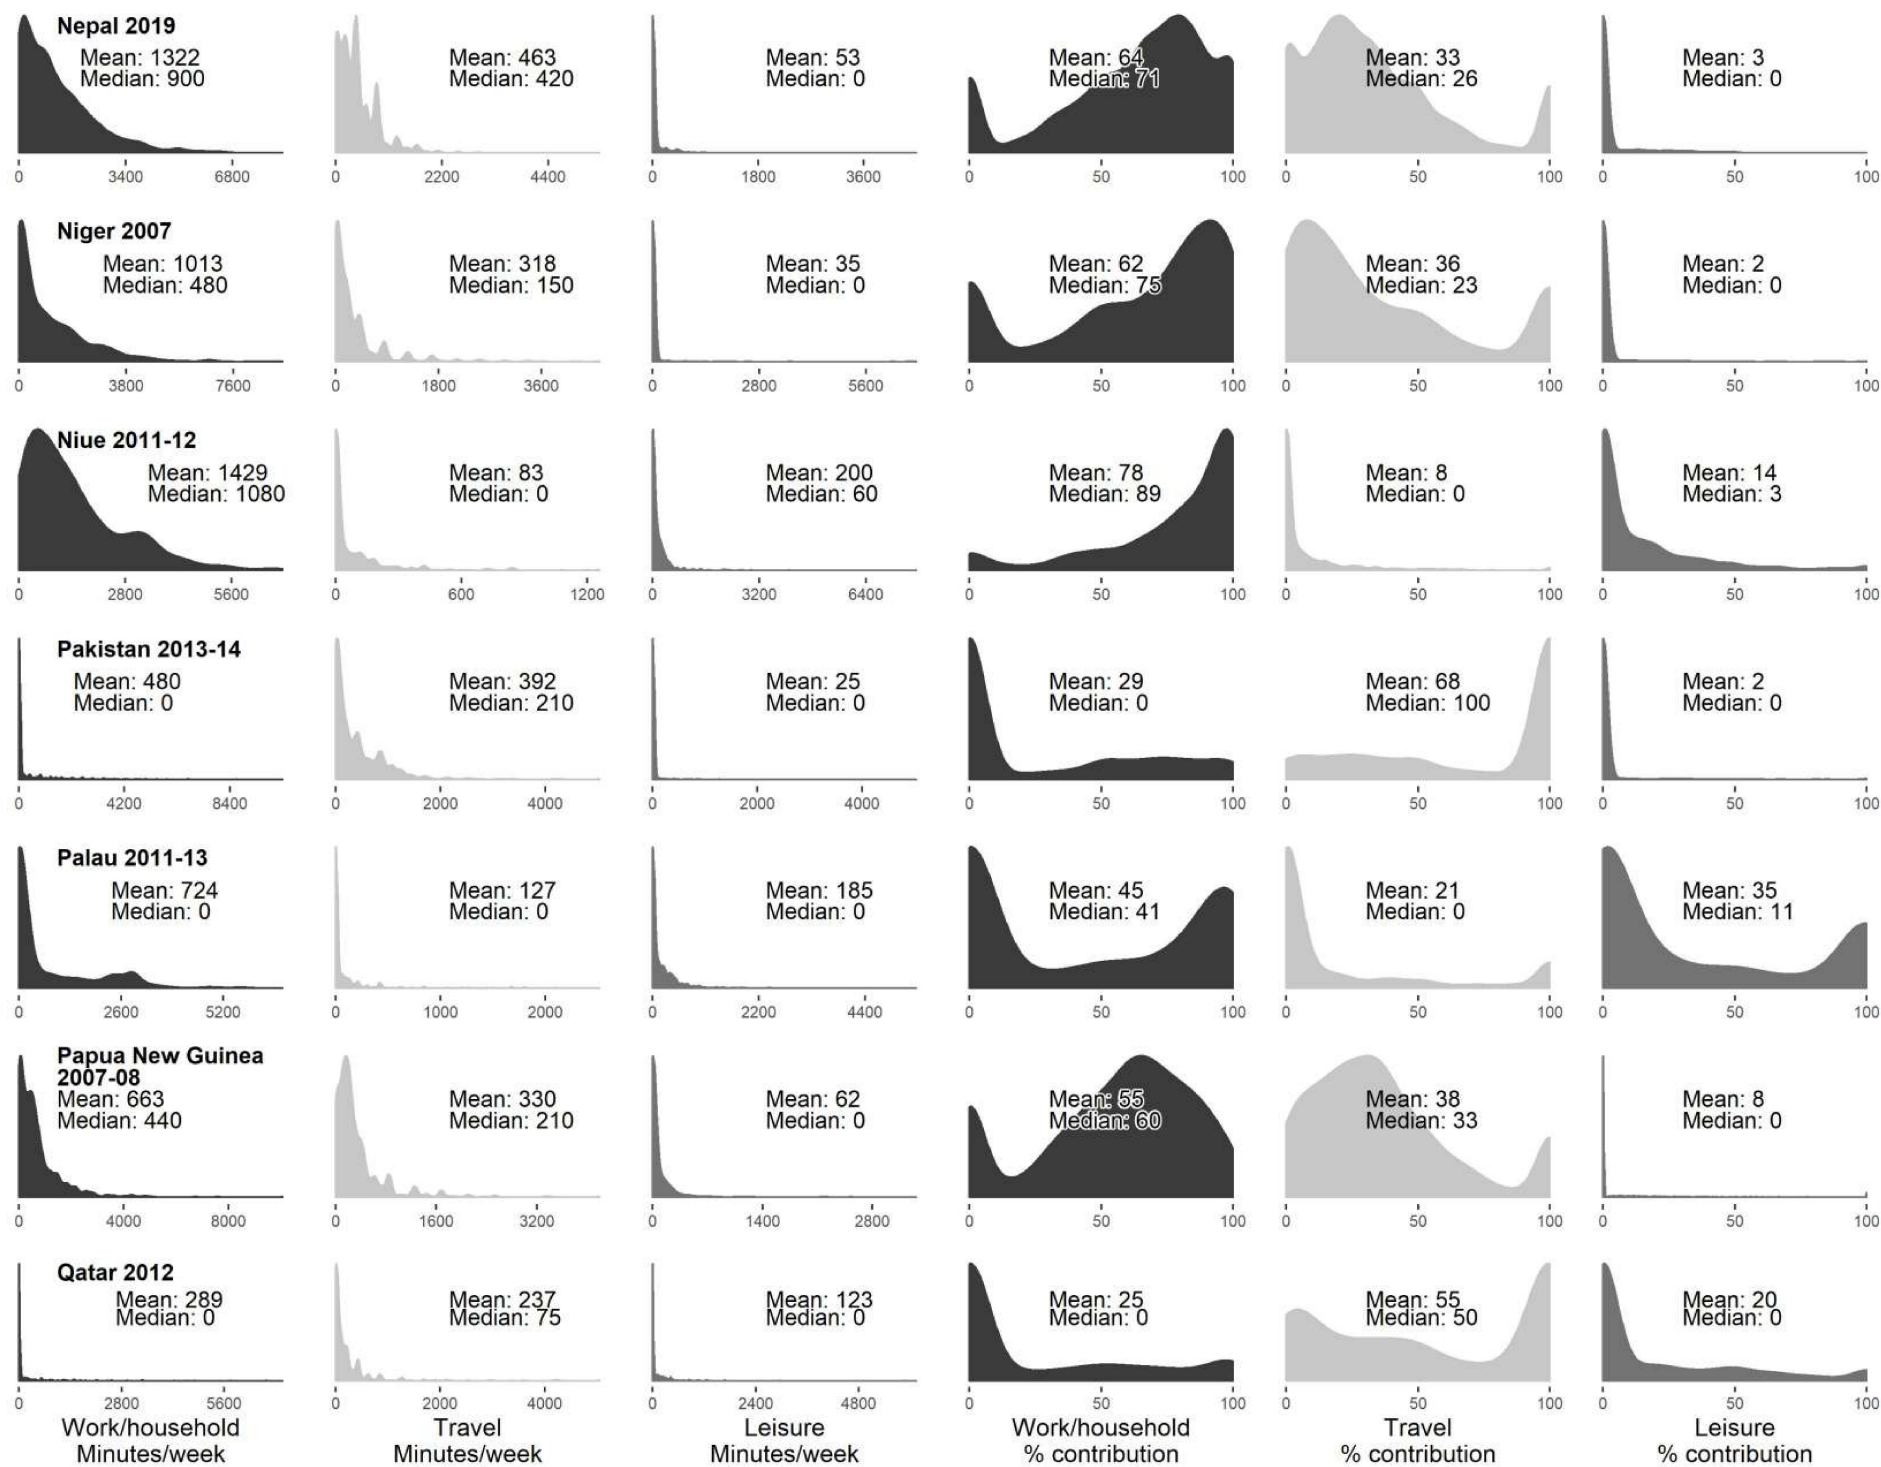

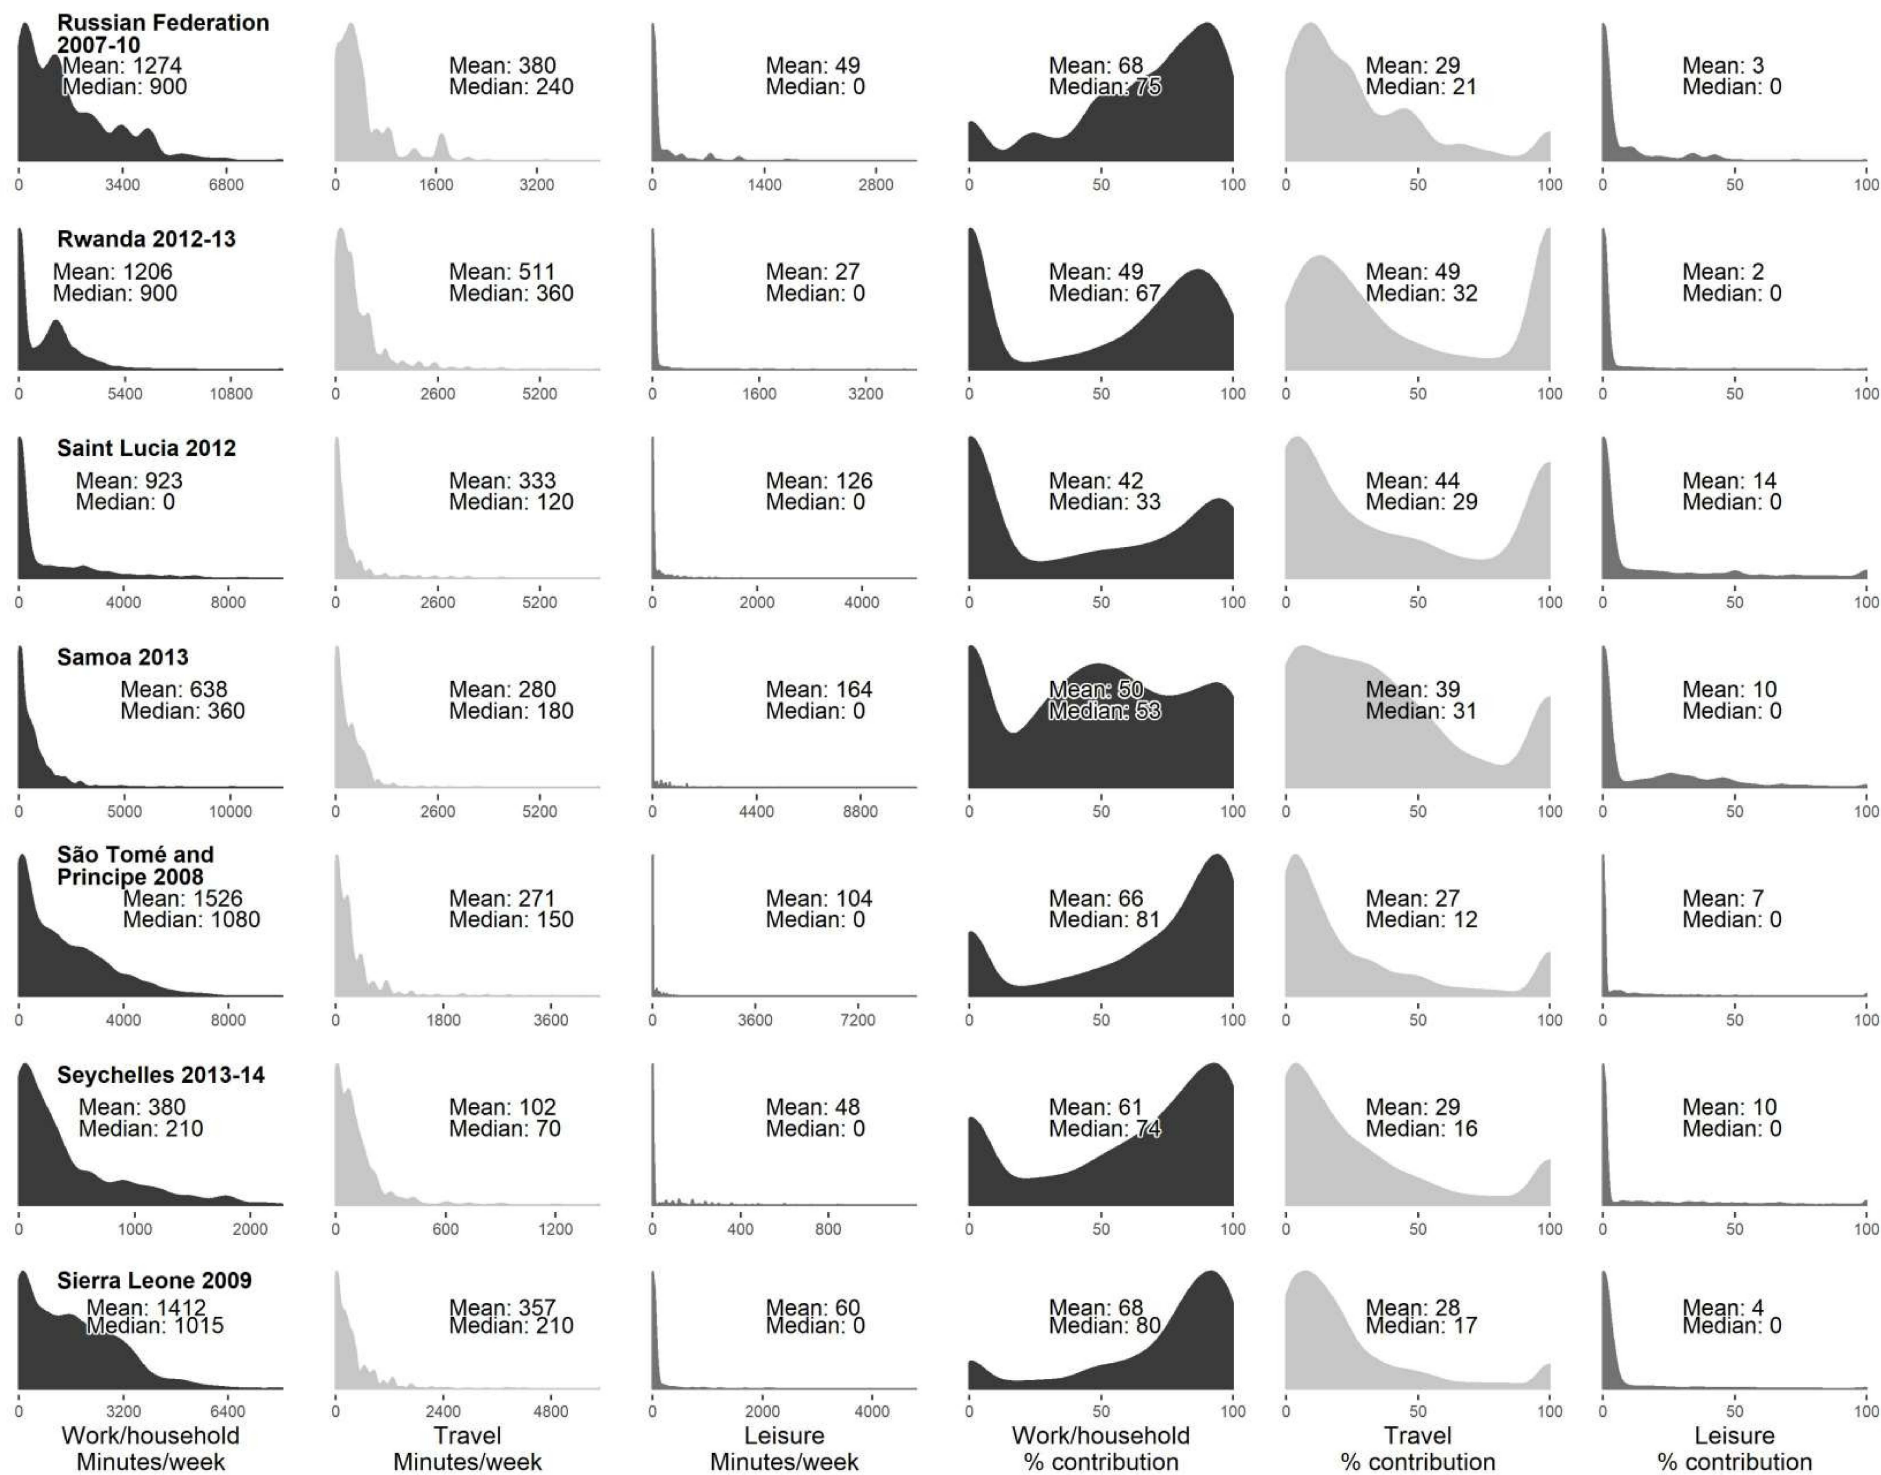

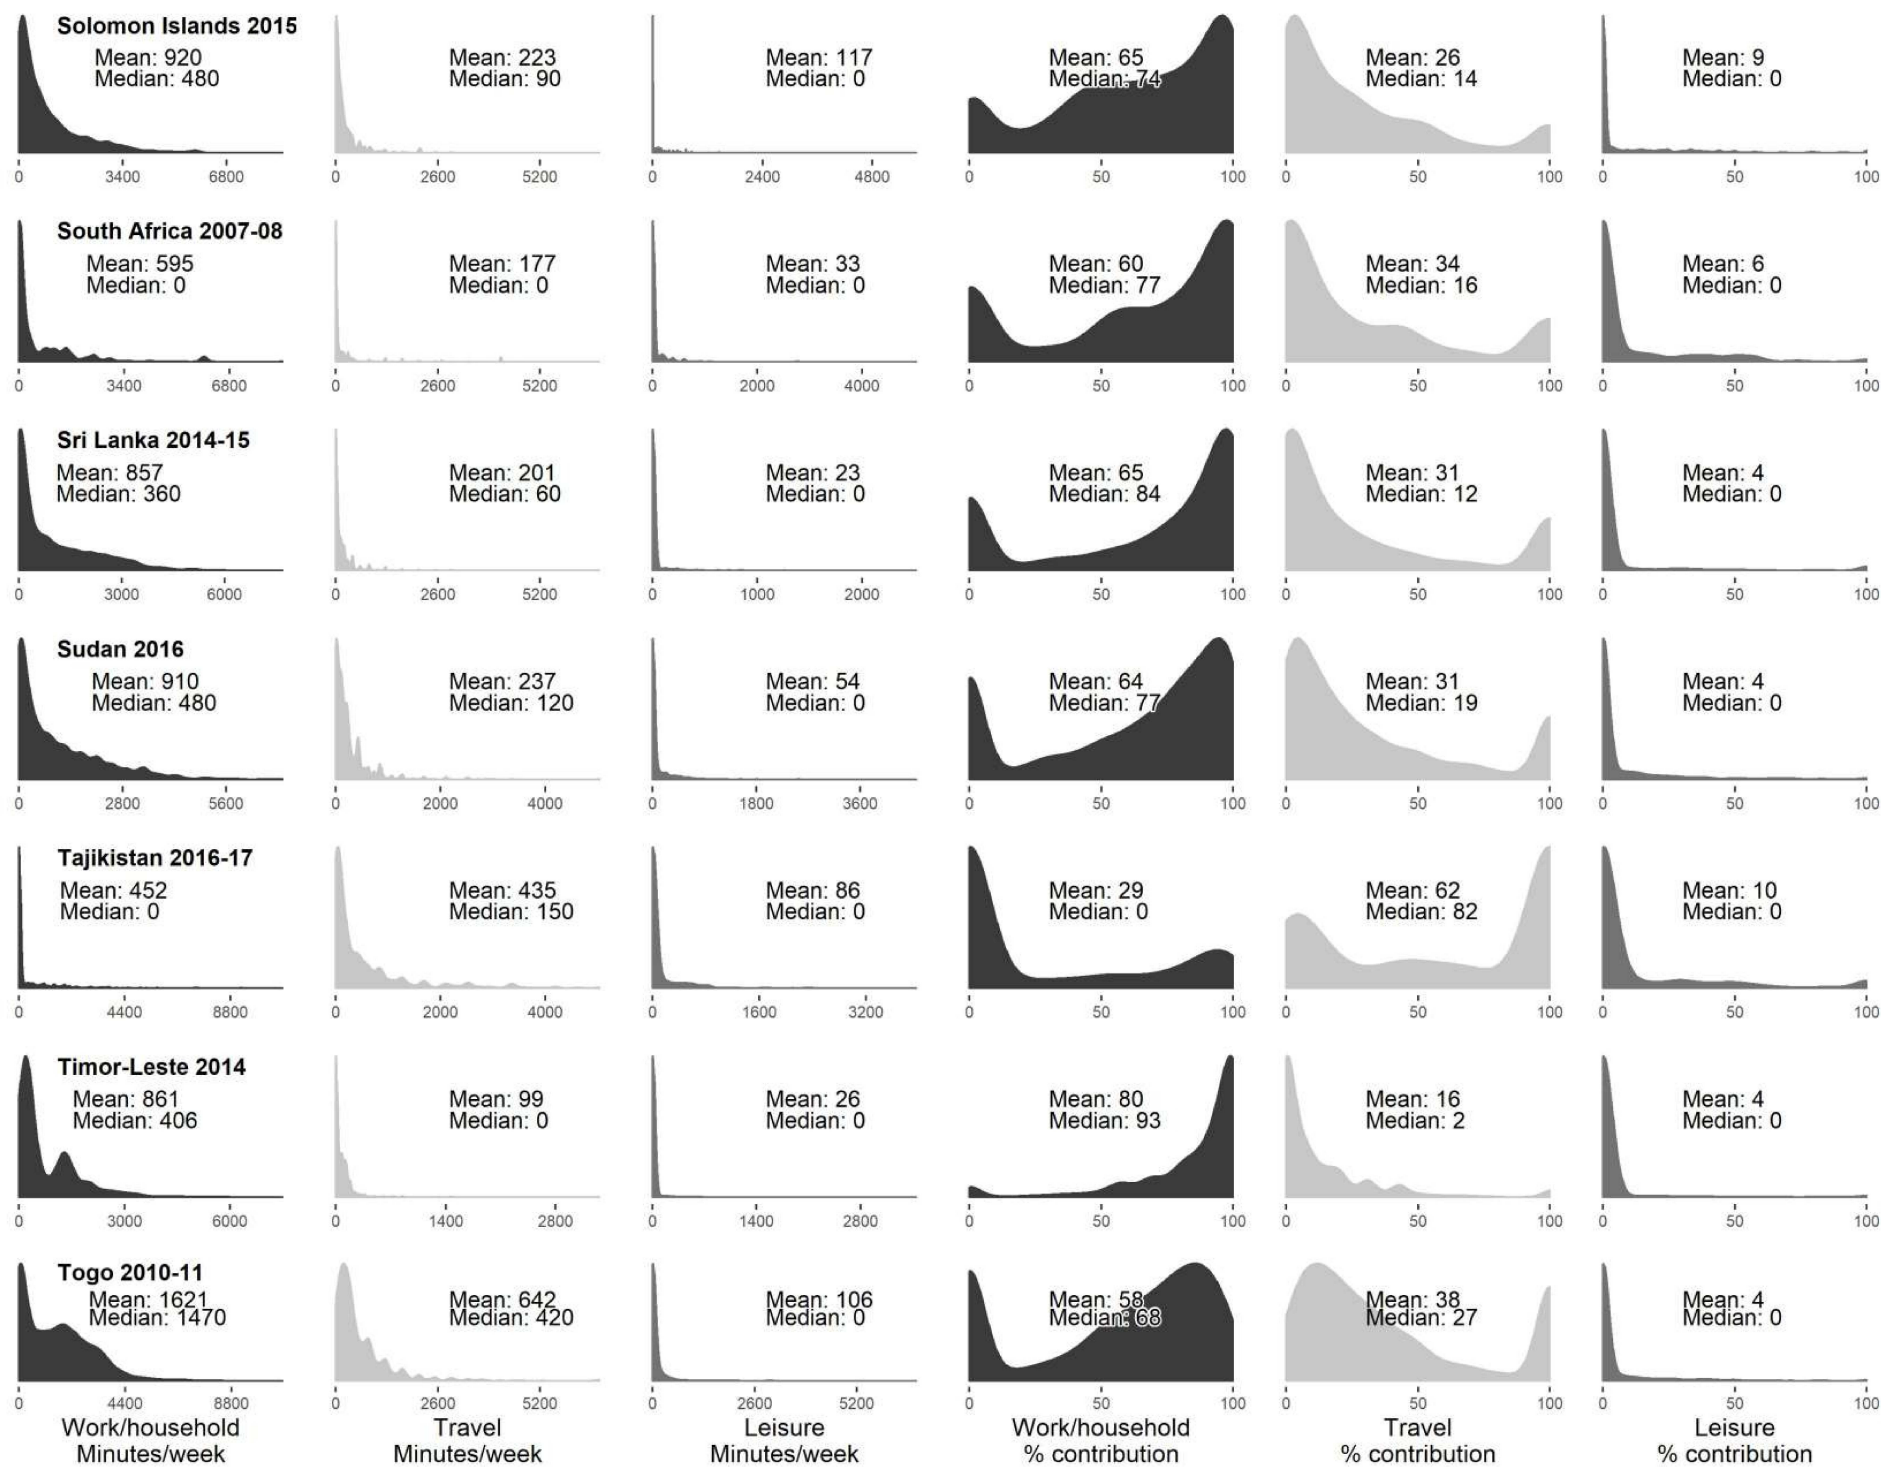



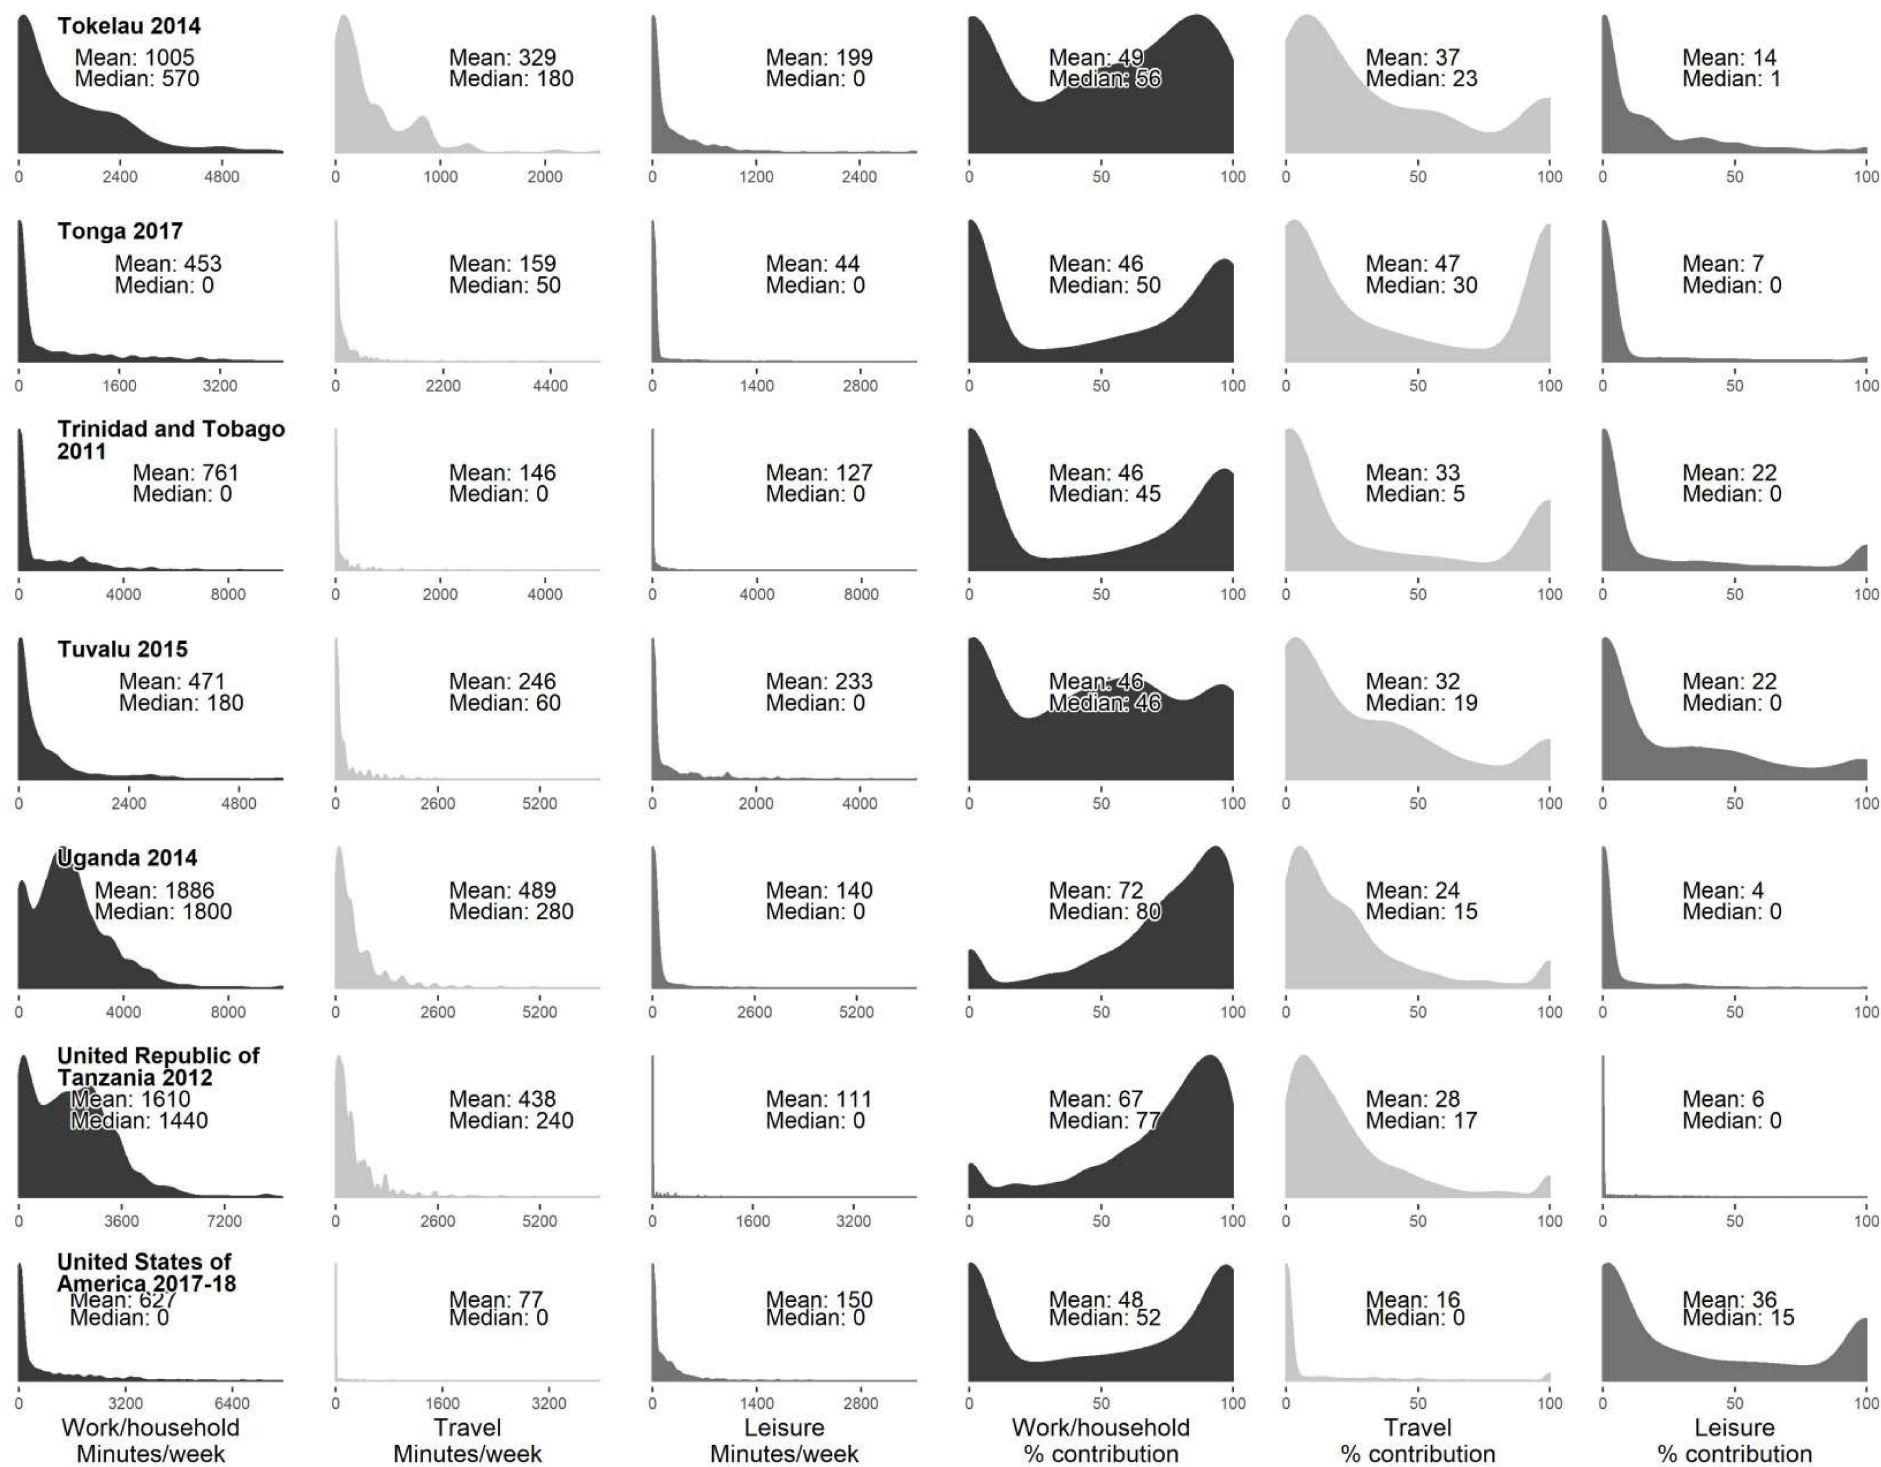

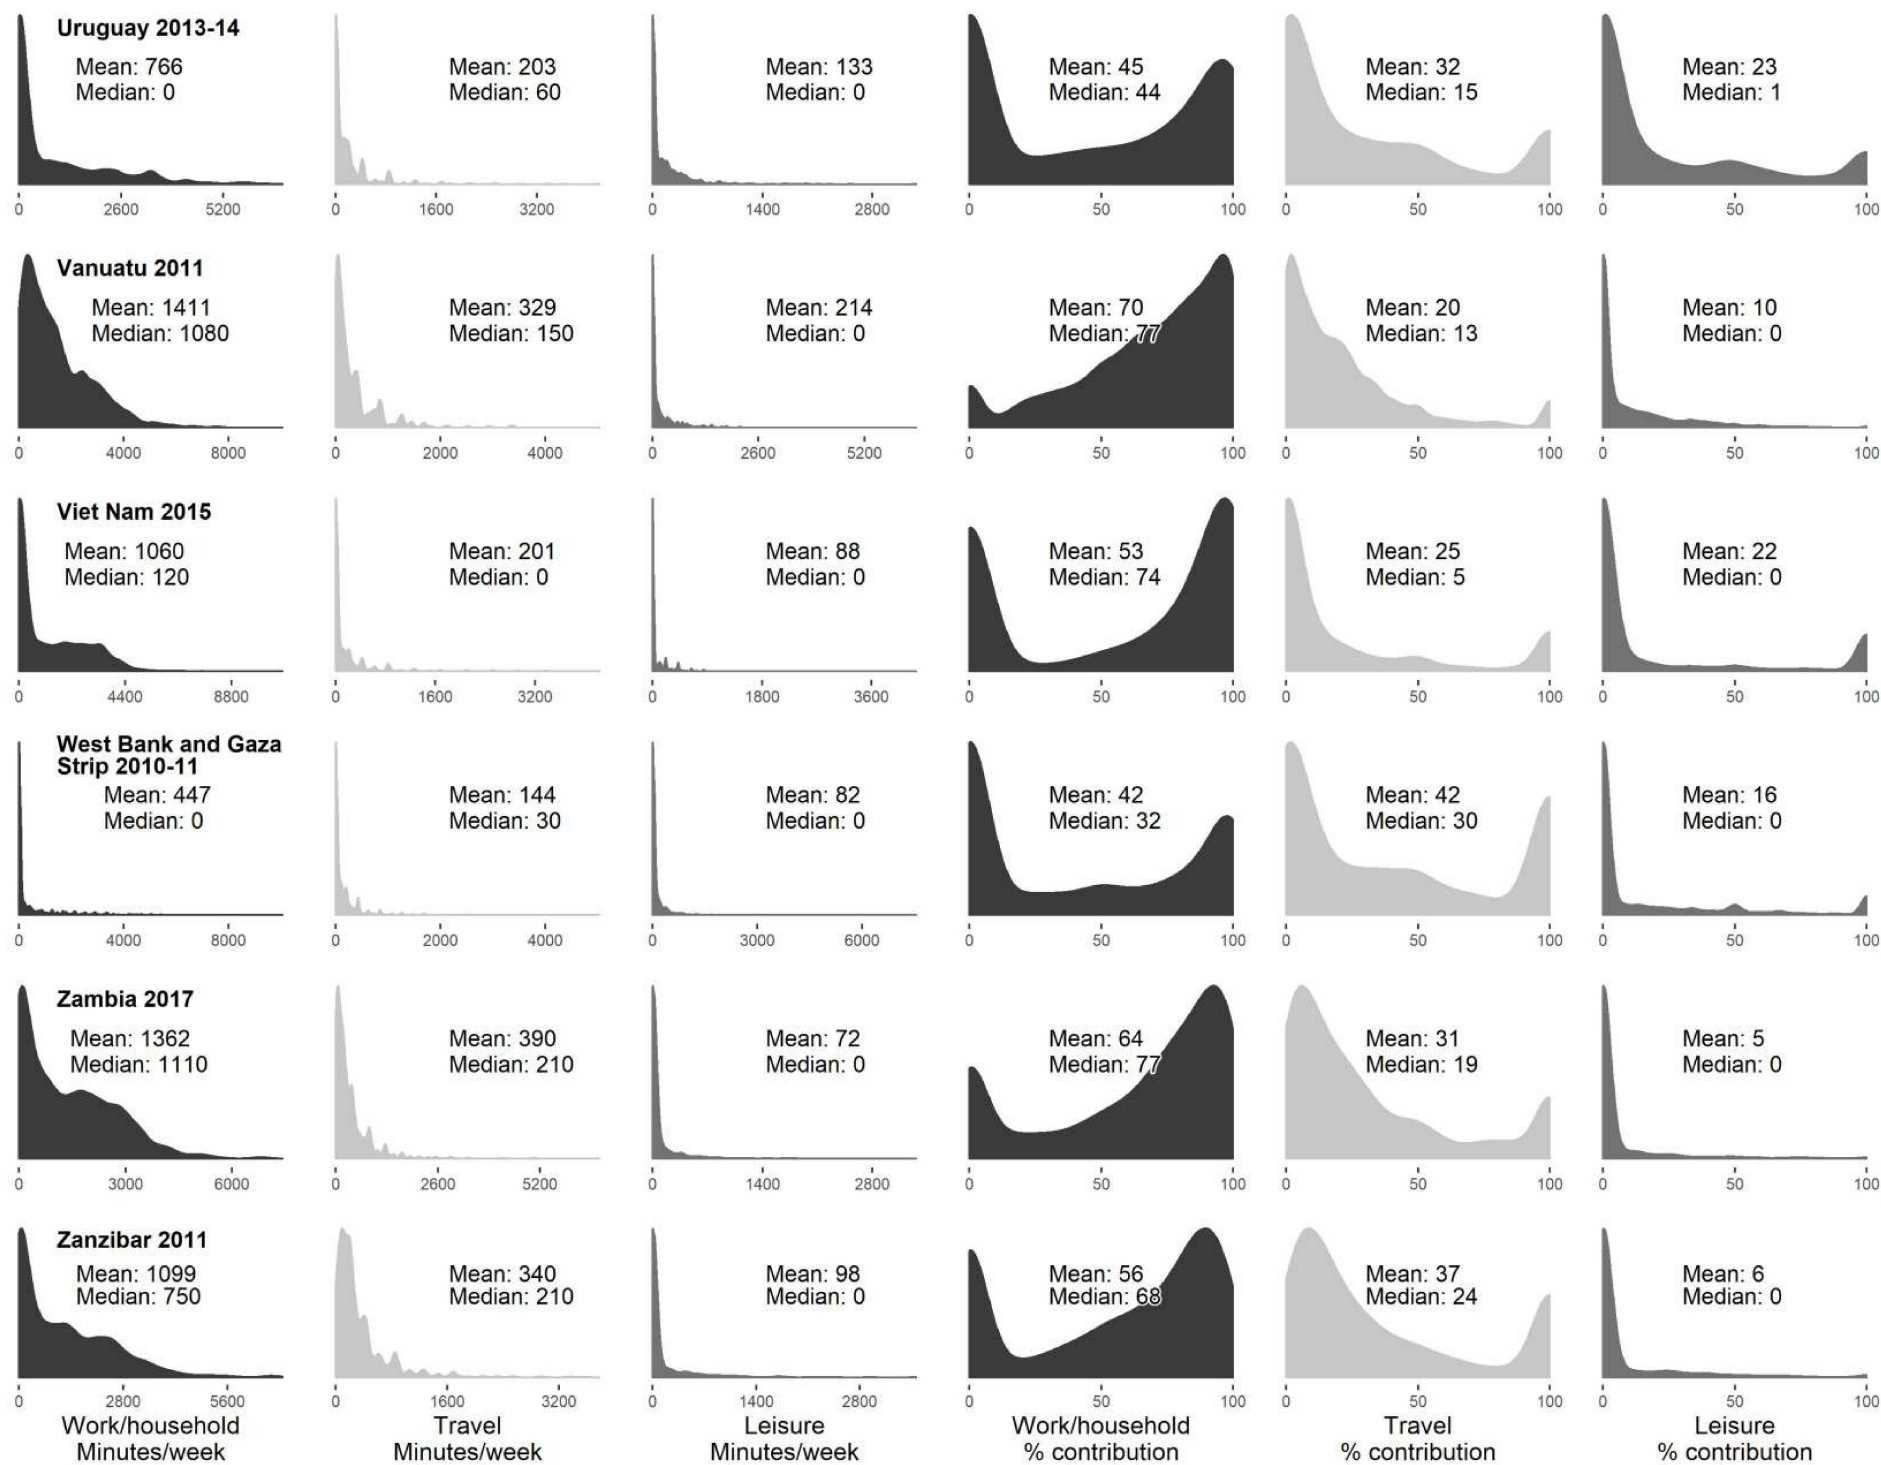

Supplement: inline-supplementary-material-6 [file inline-supplementary-material-6.pdf]
