# Supplementary material
Source: HighWire-hosted journal article supplement (https://bjsm.bmj.com/content/54/24/1488)

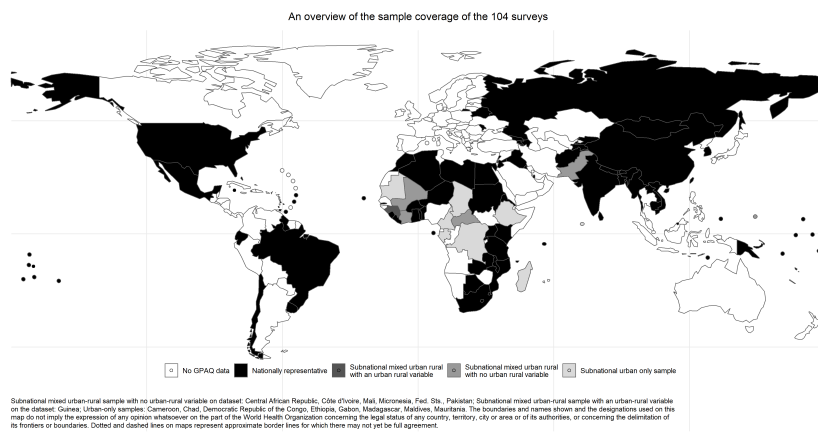

Supplement: inline-supplementary-material-2 [file inline-supplementary-material-2.pdf]
