# Supplementary material
Source: HighWire-hosted journal article supplement (https://bjsm.bmj.com/content/54/24/1488)
Supplement: inline-supplementary-material-3 [file inline-supplementary-material-3.pdf]

## Supplementary File 2. Adjusting for urban-rural coverage in subnational samples

### Overview of national and subnational survey samples

Of the 104 surveys, 14 were subnational. Of the subnational surveys, 8 were urban only, 6 were mixed urban-rural. Of the mixed urban-rural samples, 1 had an indicator variable to identify respondents as living in urban or rural area. The sample coverage and the presence of an indicator variable determined how the surveys were analysed as indicated in the flowchart below.

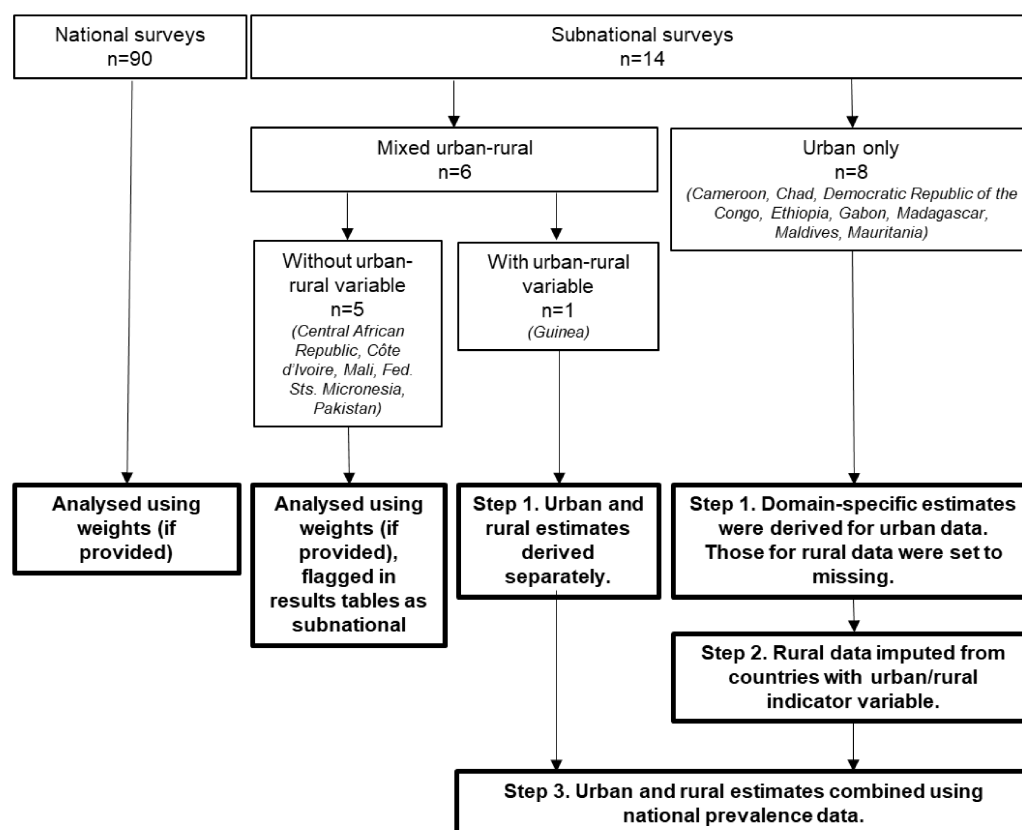

### Overview of method to adjust subnational samples

The flowchart above shows that for the majority (9 of 14) of subnational surveys, measures were taken to adjust for urban-rural coverage. The 5 surveys with mixed urban-rural samples with no indicator variable were analysed with no adjustment.

The process for adjustment involved three steps: (1) deriving summary estimates of domain-specific MVPA separately for urban and rural individuals, (2) imputing rural values for urban only samples, (3) combining urban and rural estimates according to national urban-rural prevalence data.

The flowchart below provides more details on the data used in this process.

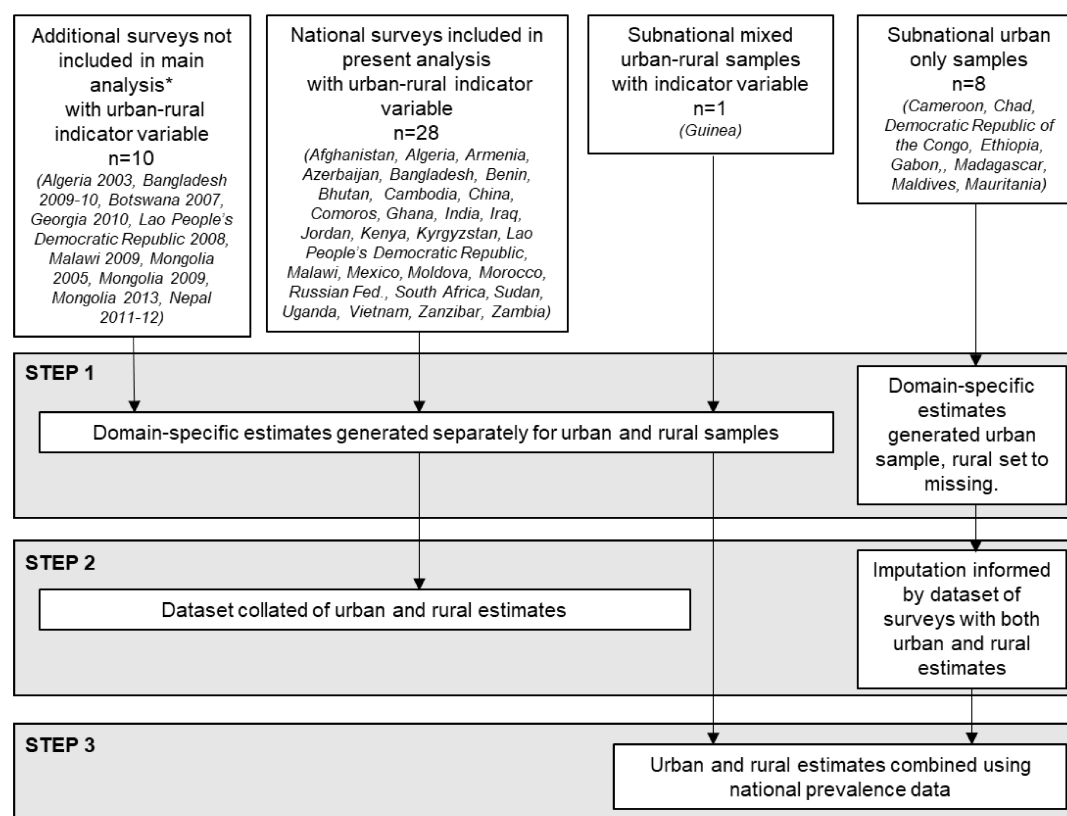

\*Additional surveys include STEPS surveys (i.e. same methods) carried out in countries at an earlier time-point to those included in main analysis. We included these to provide more data to inform the imputations. Descriptive details of these surveys are included at the end of this Supplementary Methods section.

The end goal of the 3-step process was to be able to populate the table below for each subnational survey, having taken into account the urban-rural distribution of the country.

| Demographic group | Mean minutes/week including those reporting 0 of total MVPA |        |         | Mean minutes/week excluding those reporting 0 of total MVPA |        |         |
|-------------------|-------------------------------------------------------------|--------|---------|-------------------------------------------------------------|--------|---------|
|                   | Work/household                                              | Travel | Leisure | Work/household                                              | Travel | Leisure |
| Overall           |                                                             |        |         |                                                             |        |         |
| Male              |                                                             |        |         |                                                             |        |         |
| Female            |                                                             |        |         |                                                             |        |         |
| 25-44 years       |                                                             |        |         |                                                             |        |         |
| 45-64 years       |                                                             |        |         |                                                             |        |         |

### Step 1. Deriving domain-specific estimates for urban and rural samples separately

In Step 1, domain-specific estimates of MVPA were calculated for each sex, age group and urban-rural strata for all of the surveys detailed in the flowchart above. The table below illustrates the information derived for each survey. For the 8 urban-only samples, the rural categories were set to missing.

| Sex    | Age group   | Urban/Rural | Mean minutes/week including those reporting 0 of total MVPA |        |         | Mean minutes/week excluding those reporting 0 of total MVPA |        |         |
|--------|-------------|-------------|-------------------------------------------------------------|--------|---------|-------------------------------------------------------------|--------|---------|
|        |             |             | Work/household                                              | Travel | Leisure | Work/household                                              | Travel | Leisure |
| Male   | 25-44 years | Urban       |                                                             |        |         |                                                             |        |         |
| Male   | 25-44 years | Rural       |                                                             |        |         |                                                             |        |         |
| Male   | 45-64 years | Urban       |                                                             |        |         |                                                             |        |         |
| Male   | 45-64 years | Rural       |                                                             |        |         |                                                             |        |         |
| Female | 25-44 years | Urban       |                                                             |        |         |                                                             |        |         |
| Female | 25-44 years | Rural       |                                                             |        |         |                                                             |        |         |
| Female | 45-64 years | Urban       |                                                             |        |         |                                                             |        |         |
| Female | 45-64 years | Rural       |                                                             |        |         |                                                             |        |         |

### Step 2.

For each domain, the mean ratio of rural:urban was calculated amongst the 38 surveys with complete data. This was multiplied with the urban values in the 8 urban-only surveys. This process was done separately for each of the sex\*age group strata and for each domain-specific estimate of MVPA.

We considered using ratios specific for countries of the same income strata to try to maximise the similarity between the data used for imputation and those that were being imputed. However, this would mean less data informing each imputation. As all countries involved in the imputation were from a range of low, lower-middle, and upper-middle income settings, we felt it was better to opt in favour of using the totality of the data.

Multiple imputation using chained equations was considered but with the high ratio of missing data to complete cases, and the clustered nature of the data, the model was very unstable. This method was preferable as it placed greater weight on the collected urban data.

### Step 3.

Only the 9 subnational surveys were taken forward to step 3. Population data on urban-rural prevalence specific to the survey year were obtained from <https://population.un.org/wup/DataQuery/> (see Table at end of Supplementary Methods 1 for data). Weighting the estimates according to these data, the urban and rural estimates were combined so the dataset contained information able to populate the following table:

| Sex | Age group | Mean minutes/week including those reporting 0 of total MVPA |        |         | Mean minutes/week excluding those reporting 0 of total MVPA |        |         |
|-----|-----------|-------------------------------------------------------------|--------|---------|-------------------------------------------------------------|--------|---------|
|     |           | Work/                                                       | Travel | Leisure | Work/                                                       | Travel | Leisure |

|        |             | household |  |  | household |  |  |
|--------|-------------|-----------|--|--|-----------|--|--|
| Male   | 25-44 years |           |  |  |           |  |  |
| Male   | 45-64 years |           |  |  |           |  |  |
| Female | 25-44 years |           |  |  |           |  |  |
| Female | 45-64 years |           |  |  |           |  |  |

Next, population data were obtained for the sex and age group breakdowns (<https://population.un.org/wpp/Download/Standard/Population/>; see Table at end of Supplementary Methods 1). Using these proportions, the four sex\*age group estimates were combined to produce an overall country-level estimate, and sex and age stratified estimates.

The mean minutes/week of MVPA including those reporting 0 of total MVPA were used in Figure 1. The mean minutes/week of MVPA excluding those reporting 0 of total MVPA were used to generate relative proportions that were included in Figures 2 and 3, Table 2 and Supplementary Files 8 and 9.

## Details of the 10 additional STEPS surveys used to inform the imputation process

| Country    | Date of fieldwork | Months of fieldwork | Season of fieldwork   | World Health Organization region | World Bank Income Classification | Sample                                                     |
|------------|-------------------|---------------------|-----------------------|----------------------------------|----------------------------------|------------------------------------------------------------|
| Algeria    | 2003              | Sep to Oct          | Autumn, dry           | Africa                           | UM                               | Sub-national including the wilayas of Sérif and Mostaganem |
| Bangladesh | 2009-10           | Nov to Apr          | Dry winter and spring | South-East Asia                  | LM                               | Nationally representative                                  |
| Botswana   | 2007              | Mar to May          | Autumn                | Africa                           | UM                               | Nationally representative                                  |
| Georgia    | 2010              | Aug to Dec          | Autumn, winter        | Europe                           | UM                               | Nationally representative                                  |
| Lao PDR    | 2008              | Jan to Apr          | Dry                   | Western Pacific                  | LM                               | Sub-national including Vientiane (capital)                 |
| Malawi     | 2009              | Jun to Sep          | Dry                   | Africa                           | L                                | Nationally representative                                  |
| Mongolia   | 2005              | May to Oct          | Summer, autumn        | Western Pacific                  | LM                               | Nationally representative                                  |
| Mongolia   | 2009              | Oct to Dec          | Autumn, winter        | Western Pacific                  | LM                               | Nationally representative                                  |
| Mongolia   | 2013              | May to Jun          | Spring                | Western Pacific                  | LM                               | Nationally representative                                  |
| Nepal      | 2012-13           | Jul to Jun          | All year              | South-East Asia                  | L                                | Nationally representative                                  |

UM=upper-middle, LM=lower-middle, L=low.

The urban and rural prevalence data according to the survey year for the 9 subnational countries for which adjustments were made

| Country and year of survey | Urban population (thousands) | Rural population (thousands) | Urban % | Rural % |
|----------------------------|------------------------------|------------------------------|---------|---------|
| Cameroon 2003              | 7,850                        | 8696                         | 47      | 53      |
| Chad 2008                  | 2,438                        | 8,695                        | 22      | 78      |
| Dem. Rep. Congo 2005       | 20,521                       | 34,230                       | 37      | 63      |
| Ethiopia 2006              | 12,536                       | 66,315                       | 16      | 84      |
| Gabon 2009                 | 1,348                        | 239                          | 85      | 15      |
| Guinea 2009                | 3,525                        | 7,032                        | 33      | 67      |
| Madagascar 2005            | 5,284                        | 13,053                       | 29      | 71      |
| Maldives 2011              | 138                          | 237                          | 37      | 63      |
| Mauritania 2006            | 1,385                        | 1,836                        | 43      | 57      |

Age and sex specific population data used to combined the estimates for the 9 subnational surveys for which adjustments were made

|                      | Males          |            |                |            | Females        |            |                |            |
|----------------------|----------------|------------|----------------|------------|----------------|------------|----------------|------------|
|                      | 25-44          |            | 45-64          |            | 25-44          |            | 45-64          |            |
|                      | Number (1000s) | % of total | Number (1000s) | % of total | Number (1000s) | % of total | Number (1000s) | % of total |
| Cameroon 2003        | 1989.7         | 35.2       | 801.0          | 14.2       | 1998.7         | 35.4       | 862.1          | 15.3       |
| Chad 2008            | 1226.8         | 35.4       | 486.0          | 14.0       | 1222.7         | 35.3       | 527.3          | 15.2       |
| Dem. Rep. Congo 2005 | 6032.6         | 34.2       | 2643.4         | 15.0       | 6122.8         | 34.7       | 2850.3         | 16.1       |
| Ethiopia 2006        | 8050.3         | 33.9       | 3579.3         | 15.1       | 8222.7         | 34.6       | 3899.0         | 16.4       |
| Gabon 2009           | 235.9          | 37.8       | 87.5           | 14.0       | 212.5          | 34.0       | 88.7           | 14.2       |
| Guinea 2009          | 921.4          | 30.0       | 395.3          | 12.9       | 1156.5         | 37.7       | 595.8          | 19.4       |
| Madagascar 2005      | 2139.1         | 35.3       | 856.6          | 14.1       | 2158.9         | 35.6       | 912.4          | 15.0       |
| Maldives 2011        | 66.9           | 40.5       | 24.1           | 14.6       | 53.0           | 32.0       | 21.4           | 12.9       |
| Mauritania 2006      | 360.8          | 35.1       | 141.6          | 13.8       | 363.9          | 35.4       | 161.5          | 15.7       |
